# Supplementary material for: Evidence for a Common Origin of Blacksmiths and Cultivators in the Ethiopian Ari within the Last 4500 Years: Lessons for Clustering-Based Inference
Source: PubMed Central journal article supplement (PMC4546361; doi:10.1371/journal.pgen.1005397), 2015-08-20
Supplement: pgen.1005397.s001.pdf [file pgen.1005397.s001.pdf]

| Pop ID | Description of cluster              | Sample Size | Finestructure Clusters                                                      |
|--------|-------------------------------------|-------------|-----------------------------------------------------------------------------|
| CEU    | British and Utah in Europe          | 149         | GBR:64<br>CEU:85                                                            |
| GBR    | British in Britain                  | 21          | GBR:21                                                                      |
| CHI    | Chinese in China                    | 188         | CHS:91<br>CHB:97                                                            |
| FIN    | Finnish in Finland                  | 93          | FIN:93                                                                      |
| IBS    | Iberian populations in Spain        | 14          | IBS:14                                                                      |
| JPT    | Japanese in Tokyo, Japan            | 89          | JPT:89                                                                      |
| LWK    | Luhya form Webuye, Kenya            | 87          | LWK:87                                                                      |
| TSI    | Tuscans in Italy                    | 98          | TSI:98                                                                      |
| YRI    | Yoruba in Ibadan, Nigeria           | 88          | YRI:88                                                                      |
| MKK    | HapMap Masai from Kenya             | 26          | MKK:26                                                                      |
| AR1b   | South Omo, AriBlacksmiths           | 10          | AriBlacksmith:10                                                            |
| AR1c   | South Omo, AriCultivators           | 23          | AriCultivator:23                                                            |
| AFA    | Wag Hemra Zone                      | 69          | Afar:12<br>Amhara:24<br>AriBlacksmith:1<br>Gumuz:1<br>Oromo:10<br>Tigray:21 |
| ORO    | Oromia and Wolayta regions          | 12          | Oromo:10<br>Wolayta:2                                                       |
| SOM    | Somali Peninsula and Somali region  | 37          | E.Somali:15<br>Somali:22                                                    |
| GUM    | Beni-Shangul, Gumuz                 | 13          | Gumuz:13                                                                    |
| ANU    | Gambella and South Sudanese regions | 42          | Anuak:23<br>Sudanese:19                                                     |
