# Supplementary material for: Evidence for a Common Origin of Blacksmiths and Cultivators in the Ethiopian Ari within the Last 4500 Years: Lessons for Clustering-Based Inference
Source: PubMed Central journal article supplement (PMC4546361; doi:10.1371/journal.pgen.1005397), 2015-08-20
Supplement: pgen.1005397.s002.pdf [file pgen.1005397.s002.pdf]

| <b>pop</b>   | <b>number of inds</b> | <b>pop</b>   | <b>number of inds</b> |
|--------------|-----------------------|--------------|-----------------------|
| <b>Pop1</b>  | 25                    | <b>Pop7</b>  | 25                    |
| <b>Pop2</b>  | 75                    | <b>Pop8</b>  | 100                   |
| <b>Pop3</b>  | 95                    | <b>Pop9</b>  | 100                   |
| <b>Pop4</b>  | 60                    | <b>Pop10</b> | 0                     |
| <b>Pop5</b>  | 25                    | <b>Pop11</b> | 100                   |
| <b>Pop5b</b> | 15                    | <b>Pop12</b> | 75                    |
| <b>Pop6</b>  | 100                   |              |                       |
