# Supplementary material for: Evidence for a Common Origin of Blacksmiths and Cultivators in the Ethiopian Ari within the Last 4500 Years: Lessons for Clustering-Based Inference
Source: PubMed Central journal article supplement (PMC4546361; doi:10.1371/journal.pgen.1005397), 2015-08-20
Supplement: pgen.1005397.s003.pdf [file pgen.1005397.s003.pdf]

|             | YRI   | LWK   | MKK   | ANU   | GUM   | ARIB         | ARIC         | ORO   | SOM   | AFA   | TSI   | IBS   | CEU   | GBR   | FIN   | CHI   | JPT   |
|-------------|-------|-------|-------|-------|-------|--------------|--------------|-------|-------|-------|-------|-------|-------|-------|-------|-------|-------|
| <b>YRI</b>  | 0     | 0.008 | 0.028 | 0.024 | 0.043 | 0.066        | 0.048        | 0.05  | 0.056 | 0.062 | 0.15  | 0.151 | 0.154 | 0.156 | 0.157 | 0.182 | 0.183 |
| <b>LWK</b>  | 0.008 | 0     | 0.018 | 0.016 | 0.033 | 0.056        | 0.038        | 0.039 | 0.046 | 0.051 | 0.138 | 0.14  | 0.143 | 0.145 | 0.146 | 0.172 | 0.174 |
| <b>MKK</b>  | 0.028 | 0.018 | 0     | 0.016 | 0.026 | 0.04         | 0.02         | 0.012 | 0.018 | 0.02  | 0.095 | 0.097 | 0.101 | 0.102 | 0.104 | 0.14  | 0.142 |
| <b>ANU</b>  | 0.024 | 0.016 | 0.016 | 0     | 0.02  | 0.052        | 0.033        | 0.036 | 0.041 | 0.048 | 0.143 | 0.144 | 0.147 | 0.149 | 0.15  | 0.175 | 0.176 |
| <b>GUM</b>  | 0.043 | 0.033 | 0.026 | 0.02  | 0     | 0.048        | 0.03         | 0.037 | 0.045 | 0.049 | 0.139 | 0.141 | 0.144 | 0.145 | 0.146 | 0.173 | 0.174 |
| <b>ARIB</b> | 0.066 | 0.056 | 0.04  | 0.052 | 0.048 | 0            | <b>0.023</b> | 0.036 | 0.048 | 0.047 | 0.124 | 0.126 | 0.13  | 0.131 | 0.133 | 0.167 | 0.168 |
| <b>ARIC</b> | 0.048 | 0.038 | 0.02  | 0.033 | 0.03  | <b>0.023</b> | 0            | 0.015 | 0.027 | 0.026 | 0.102 | 0.104 | 0.108 | 0.109 | 0.111 | 0.146 | 0.148 |
| <b>ORO</b>  | 0.05  | 0.039 | 0.012 | 0.036 | 0.037 | 0.036        | 0.015        | 0     | 0.007 | 0.002 | 0.06  | 0.062 | 0.067 | 0.069 | 0.072 | 0.119 | 0.12  |
| <b>SOM</b>  | 0.056 | 0.046 | 0.018 | 0.041 | 0.045 | 0.048        | 0.027        | 0.007 | 0     | 0.008 | 0.067 | 0.07  | 0.074 | 0.076 | 0.079 | 0.126 | 0.127 |
| <b>AFA</b>  | 0.062 | 0.051 | 0.02  | 0.048 | 0.049 | 0.047        | 0.026        | 0.002 | 0.008 | 0     | 0.047 | 0.05  | 0.054 | 0.056 | 0.06  | 0.113 | 0.114 |
| <b>TSI</b>  | 0.15  | 0.138 | 0.095 | 0.143 | 0.139 | 0.124        | 0.102        | 0.06  | 0.067 | 0.047 | 0     | 0.003 | 0.004 | 0.006 | 0.012 | 0.11  | 0.111 |
| <b>IBS</b>  | 0.151 | 0.14  | 0.097 | 0.144 | 0.141 | 0.126        | 0.104        | 0.062 | 0.07  | 0.05  | 0.003 | 0     | 0.003 | 0.005 | 0.011 | 0.111 | 0.113 |
| <b>CEU</b>  | 0.154 | 0.143 | 0.101 | 0.147 | 0.144 | 0.13         | 0.108        | 0.067 | 0.074 | 0.054 | 0.004 | 0.003 | 0     | 0.002 | 0.007 | 0.11  | 0.112 |
| <b>GBR</b>  | 0.156 | 0.145 | 0.102 | 0.149 | 0.145 | 0.131        | 0.109        | 0.069 | 0.076 | 0.056 | 0.006 | 0.005 | 0.002 | 0     | 0.008 | 0.11  | 0.112 |
| <b>FIN</b>  | 0.157 | 0.146 | 0.104 | 0.15  | 0.146 | 0.133        | 0.111        | 0.072 | 0.079 | 0.06  | 0.012 | 0.011 | 0.007 | 0.008 | 0     | 0.101 | 0.103 |
| <b>CHI</b>  | 0.182 | 0.172 | 0.14  | 0.175 | 0.173 | 0.167        | 0.146        | 0.119 | 0.126 | 0.113 | 0.11  | 0.111 | 0.11  | 0.11  | 0.101 | 0     | 0.007 |
| <b>JPT</b>  | 0.183 | 0.174 | 0.142 | 0.176 | 0.174 | 0.168        | 0.148        | 0.12  | 0.127 | 0.114 | 0.111 | 0.113 | 0.112 | 0.112 | 0.103 | 0.007 | 0     |
