# Supplementary material for: Evidence for a Common Origin of Blacksmiths and Cultivators in the Ethiopian Ari within the Last 4500 Years: Lessons for Clustering-Based Inference
Source: PubMed Central journal article supplement (PMC4546361; doi:10.1371/journal.pgen.1005397), 2015-08-20
Supplement: pgen.1005397.s004.pdf [file pgen.1005397.s004.pdf]

|              | Pop1  | Pop2  | Pop3  | Pop4  | Pop5b        | Pop5         | Pop6  | Pop7  | Pop8  | Pop9  | Pop10 | Pop11 | Pop12 |
|--------------|-------|-------|-------|-------|--------------|--------------|-------|-------|-------|-------|-------|-------|-------|
| <b>Pop1</b>  | 0     | 0.122 | 0.122 | 0.122 | 0.139        | 0.113        | 0.112 | 0.123 | 0.205 | 0.205 | 0.206 | 0.254 | 0.254 |
| <b>Pop2</b>  | 0.122 | 0     | 0.013 | 0.045 | 0.066        | 0.041        | 0.041 | 0.044 | 0.16  | 0.159 | 0.16  | 0.205 | 0.206 |
| <b>Pop3</b>  | 0.122 | 0.013 | 0     | 0.044 | 0.066        | 0.041        | 0.041 | 0.044 | 0.159 | 0.159 | 0.159 | 0.205 | 0.206 |
| <b>Pop4</b>  | 0.122 | 0.045 | 0.044 | 0     | 0.063        | 0.039        | 0.039 | 0.042 | 0.16  | 0.159 | 0.16  | 0.206 | 0.206 |
| <b>Pop5b</b> | 0.139 | 0.066 | 0.066 | 0.063 | 0            | <b>0.025</b> | 0.036 | 0.05  | 0.135 | 0.135 | 0.133 | 0.186 | 0.186 |
| <b>Pop5</b>  | 0.113 | 0.041 | 0.041 | 0.039 | <b>0.025</b> | 0            | 0.012 | 0.025 | 0.114 | 0.113 | 0.111 | 0.165 | 0.165 |
| <b>Pop6</b>  | 0.112 | 0.041 | 0.041 | 0.039 | 0.036        | 0.012        | 0     | 0.026 | 0.113 | 0.113 | 0.111 | 0.165 | 0.164 |
| <b>Pop7</b>  | 0.123 | 0.044 | 0.044 | 0.042 | 0.05         | 0.025        | 0.026 | 0     | 0.159 | 0.159 | 0.159 | 0.207 | 0.207 |
| <b>Pop8</b>  | 0.205 | 0.16  | 0.159 | 0.16  | 0.135        | 0.114        | 0.113 | 0.159 | 0     | 0.005 | 0.02  | 0.097 | 0.097 |
| <b>Pop9</b>  | 0.205 | 0.159 | 0.159 | 0.159 | 0.135        | 0.113        | 0.113 | 0.159 | 0.005 | 0     | 0.02  | 0.097 | 0.096 |
| <b>Pop10</b> | 0.206 | 0.16  | 0.159 | 0.16  | 0.133        | 0.111        | 0.111 | 0.159 | 0.02  | 0.02  | 0     | 0.098 | 0.097 |
| <b>Pop11</b> | 0.254 | 0.205 | 0.205 | 0.206 | 0.186        | 0.165        | 0.165 | 0.207 | 0.097 | 0.097 | 0.098 | 0     | 0.016 |
| <b>Pop12</b> | 0.254 | 0.206 | 0.206 | 0.206 | 0.186        | 0.165        | 0.164 | 0.207 | 0.097 | 0.096 | 0.097 | 0.016 | 0     |
