# Supplementary material for: Evidence for a Common Origin of Blacksmiths and Cultivators in the Ethiopian Ari within the Last 4500 Years: Lessons for Clustering-Based Inference
Source: PubMed Central journal article supplement (PMC4546361; doi:10.1371/journal.pgen.1005397), 2015-08-20
Supplement: pgen.1005397.s006.pdf [file pgen.1005397.s006.pdf]

|              | Pop1  | Pop2  | Pop3  | Pop4  | Pop5b        | Pop5         | Pop6  | Pop7  | Pop8  | Pop9  | Pop10 | Pop11 | Pop12 |
|--------------|-------|-------|-------|-------|--------------|--------------|-------|-------|-------|-------|-------|-------|-------|
| <b>Pop1</b>  | 0     | 0.123 | 0.124 | 0.124 | 0.122        | 0.108        | 0.11  | 0.123 | 0.207 | 0.207 | 0.206 | 0.253 | 0.253 |
| <b>Pop2</b>  | 0.123 | 0     | 0.012 | 0.043 | 0.05         | 0.036        | 0.038 | 0.044 | 0.16  | 0.161 | 0.16  | 0.207 | 0.207 |
| <b>Pop3</b>  | 0.124 | 0.012 | 0     | 0.044 | 0.051        | 0.036        | 0.038 | 0.045 | 0.16  | 0.161 | 0.16  | 0.207 | 0.208 |
| <b>Pop4</b>  | 0.124 | 0.043 | 0.044 | 0     | 0.049        | 0.034        | 0.037 | 0.042 | 0.161 | 0.162 | 0.161 | 0.207 | 0.208 |
| <b>Pop5b</b> | 0.122 | 0.05  | 0.051 | 0.049 | 0            | <b>0.022</b> | 0.029 | 0.048 | 0.122 | 0.122 | 0.12  | 0.173 | 0.174 |
| <b>Pop5</b>  | 0.108 | 0.036 | 0.036 | 0.034 | <b>0.022</b> | 0            | 0.009 | 0.026 | 0.108 | 0.108 | 0.105 | 0.16  | 0.161 |
| <b>Pop6</b>  | 0.11  | 0.038 | 0.038 | 0.037 | 0.029        | 0.009        | 0     | 0.025 | 0.11  | 0.11  | 0.107 | 0.162 | 0.163 |
| <b>Pop7</b>  | 0.123 | 0.044 | 0.045 | 0.042 | 0.048        | 0.026        | 0.025 | 0     | 0.159 | 0.159 | 0.159 | 0.206 | 0.207 |
| <b>Pop8</b>  | 0.207 | 0.16  | 0.16  | 0.161 | 0.122        | 0.108        | 0.11  | 0.159 | 0     | 0.005 | 0.02  | 0.096 | 0.096 |
| <b>Pop9</b>  | 0.207 | 0.161 | 0.161 | 0.162 | 0.122        | 0.108        | 0.11  | 0.159 | 0.005 | 0     | 0.02  | 0.096 | 0.097 |
| <b>Pop10</b> | 0.206 | 0.16  | 0.16  | 0.161 | 0.12         | 0.105        | 0.107 | 0.159 | 0.02  | 0.02  | 0     | 0.096 | 0.096 |
| <b>Pop11</b> | 0.253 | 0.207 | 0.207 | 0.207 | 0.173        | 0.16         | 0.162 | 0.206 | 0.096 | 0.096 | 0.096 | 0     | 0.016 |
| <b>Pop12</b> | 0.253 | 0.207 | 0.208 | 0.208 | 0.174        | 0.161        | 0.163 | 0.207 | 0.096 | 0.097 | 0.096 | 0.016 | 0     |
