# Supplementary material for: Evidence for a Common Origin of Blacksmiths and Cultivators in the Ethiopian Ari within the Last 4500 Years: Lessons for Clustering-Based Inference
Source: PubMed Central journal article supplement (PMC4546361; doi:10.1371/journal.pgen.1005397), 2015-08-20
Supplement: pgen.1005397.s008.pdf [file pgen.1005397.s008.pdf]

| <b>Group</b> | <b>Pop1</b> | <b>Pop2</b> | <b>Pop3</b> | <b>Pop4</b> | <b>Pop5b</b>       | <b>Pop5</b>        | <b>Pop6</b> |
|--------------|-------------|-------------|-------------|-------------|--------------------|--------------------|-------------|
| <b>Pop1</b>  | 0           | 0.012-0.013 | 0.044-0.045 | 0.044-0.047 | 0.051-0.061        | 0.035-0.04         | 0.142-0.149 |
| <b>Pop2</b>  | 0.012-0.013 | 0           | 0.044-0.045 | 0.044-0.047 | 0.05-0.061         | 0.035-0.04         | 0.142-0.148 |
| <b>Pop3</b>  | 0.044-0.045 | 0.044-0.045 | 0           | 0.042-0.044 | 0.049-0.058        | 0.033-0.037        | 0.142-0.148 |
| <b>Pop4</b>  | 0.044-0.047 | 0.044-0.047 | 0.042-0.044 | 0           | 0.031-0.034        | 0.011-0.014        | 0.069-0.072 |
| <b>Pop5b</b> | 0.051-0.061 | 0.05-0.061  | 0.049-0.058 | 0.031-0.034 | 0                  | <b>0.019-0.027</b> | 0.11-0.123  |
| <b>Pop5</b>  | 0.035-0.04  | 0.035-0.04  | 0.033-0.037 | 0.011-0.014 | <b>0.019-0.027</b> | 0                  | 0.095-0.102 |
| <b>Pop6</b>  | 0.142-0.149 | 0.142-0.148 | 0.142-0.148 | 0.069-0.072 | 0.11-0.123         | 0.095-0.102        | 0           |
