# Supplementary material for: Evidence for a Common Origin of Blacksmiths and Cultivators in the Ethiopian Ari within the Last 4500 Years: Lessons for Clustering-Based Inference
Source: PubMed Central journal article supplement (PMC4546361; doi:10.1371/journal.pgen.1005397), 2015-08-20
Supplement: pgen.1005397.s009.pdf [file pgen.1005397.s009.pdf]

| <b>Group</b>             | <b>(a) all-donors</b> | <b>(b) non-Ari-donors</b> | <b>(c) non-Pagani-donors</b> |
|--------------------------|-----------------------|---------------------------|------------------------------|
| <b>AR1c</b>              | 0.215 (0.201 - 0.223) | 0.179 (0.17 - 0.183)      | 0.144 (0.14 - 0.147)         |
| <b>AR1b</b>              | 0.269 (0.264 - 0.286) | 0.179 (0.176 - 0.181)     | 0.142 (0.14 - 0.143)         |
| <b>Pop5 (MA)</b>         | 0.229 (0.226 - 0.235) | 0.177 (0.176 - 0.179)     | 0.149 (0.148 - 0.151)        |
| <b>Pop5b (MA)</b>        | 0.596 (0.54 - 0.653)  | 0.176 (0.175 - 0.178)     | 0.148 (0.148 - 0.149)        |
| <b>Pop5 (RN)</b>         | 0.214 (0.212 - 0.219) | 0.176 (0.175 - 0.177)     | 0.149 (0.148 - 0.15)         |
| <b>Pop5b (RN)</b>        | 0.206 (0.204 - 0.21)  | 0.175 (0.174 - 0.177)     | 0.147 (0.146 - 0.148)        |
| <b>Pop5 (RN+BN)</b>      | 0.215 (0.209 - 0.22)  | 0.176 (0.175 - 0.178)     | 0.149 (0.148 - 0.15)         |
| <b>Pop5b (RN+BN)</b>     | 0.317 (0.301 - 0.331) | 0.174 (0.173 - 0.176)     | 0.146 (0.145 - 0.148)        |
| <b>Pop5 (RN+BN+80%)</b>  | 0.215 (0.212 - 0.222) | 0.176 (0.175 - 0.178)     | 0.149 (0.148 - 0.15)         |
| <b>Pop5b (RN+BN+80%)</b> | 0.312 (0.291 - 0.341) | 0.175 (0.174 - 0.176)     | 0.147 (0.146 - 0.147)        |
