# Supplementary material for: Evidence for a Common Origin of Blacksmiths and Cultivators in the Ethiopian Ari within the Last 4500 Years: Lessons for Clustering-Based Inference
Source: PubMed Central journal article supplement (PMC4546361; doi:10.1371/journal.pgen.1005397), 2015-08-20
Supplement: pgen.1005397.s010.pdf [file pgen.1005397.s010.pdf]

| Group | YRI              | LWK              | MKK              | ANU              | GUM              | ARib             | ARic             | ORO              | SOM              | AFA              |
|-------|------------------|------------------|------------------|------------------|------------------|------------------|------------------|------------------|------------------|------------------|
| YRI   | 58.7 (58-59.5)   | 41.3 (40.5-42)   | 0 (0-0)          | 0 (0-0)          | 0 (0-0)          | 0 (0-0)          | 0 (0-0)          | 0 (0-0)          | 0 (0-0)          | 0 (0-0)          |
| LWK   | 37.9 (37.1-38.8) | 62.1 (61.2-62.9) | 0 (0-0)          | 0 (0-0)          | 0 (0-0)          | 0 (0-0)          | 0 (0-0)          | 0 (0-0)          | 0 (0-0)          | 0 (0-0)          |
| MKK   | 0 (0-0)          | 21.7 (20.9-22.5) | 33.7 (31.4-36)   | 23 (21.6-24.3)   | 0 (0-0)          | 0 (0-0)          | 0 (0-0)          | 7.9 (-2.6-18.4)  | 3.7 (2.5-4.9)    | 10 (2.2-17.8)    |
| ANU   | 11.7 (11.3-12.1) | 16.7 (16.1-17.2) | 19.3 (17.8-20.9) | 35 (33.5-36.5)   | 14.6 (13.3-15.8) | 0 (0-0)          | 0 (0-0)          | 0 (0-0)          | 2.7 (2.2-3.2)    | 0 (0-0)          |
| GUM   | 0 (0-0)          | 1 (0.6-1.4)      | 0 (0-0)          | 42.5 (41.3-43.6) | 45.1 (42.7-47.4) | 0 (0-0)          | 4.9 (4.1-5.7)    | 6.5 (2.6-10.5)   | 0 (0-0)          | 0 (-2.4-2.4)     |
| ARib  | 0 (0-0)          | 0 (0-0)          | 0 (0-0)          | 0 (0-0)          | 0 (0-0)          | 69.1 (66.7-71.6) | 30.9 (28.4-33.3) | 0 (0-0)          | 0 (0-0)          | 0 (0-0)          |
| ARic  | 0 (0-0)          | 2 (1.8-2.3)      | 0 (0-0)          | 2.9 (2.2-3.5)    | 0 (0-0)          | 11.7 (10.9-12.6) | 38 (36-40)       | 45.4 (43.6-47.1) | 0 (0-0)          | 0 (0-0)          |
| ORO   | 0.5 (0.3-0.8)    | 0.2 (-0.1-0.6)   | 3.4 (2.7-4.1)    | 2.1 (1.4-2.7)    | 1.4 (1.2-1.6)    | 1.2 (0.9-1.5)    | 14.4 (13.5-15.3) | 0.2 (-0.1-0.5)   | 6.4 (5.4-7.4)    | 70 (68.1-72)     |
| SOM   | 0 (0-0)          | 0 (-0.1-0.1)     | 0 (0-0)          | 0 (0-0)          | 0 (0-0)          | 0 (0-0)          | 0 (0-0)          | 0 (0-0)          | 42.8 (41.2-44.5) | 57.2 (55.5-58.8) |
| AFA   | 0 (0-0)          | 0 (0-0)          | 0 (0-0)          | 0 (0-0)          | 0 (0-0)          | 0 (0-0)          | 0 (0-0)          | 87.8 (86-89.7)   | 0.6 (-0.4-1.6)   | 6.5 (5.5-7.6)    |
| TSI   | 0 (0-0)          | 0 (0-0)          | 0 (0-0)          | 0 (0-0)          | 0 (0-0)          | 0 (0-0)          | 0 (0-0)          | 0 (0-0)          | 0 (0-0)          | 0 (0-0)          |
| IBS   | 0.5 (0.4-0.6)    | 0 (-0.1-0.1)     | 0 (0-0)          | 0 (0-0)          | 0 (0-0)          | 0 (0-0)          | 0 (0-0)          | 0 (0-0)          | 0 (0-0)          | 1.8 (1.4-2.2)    |
| CEU   | 0 (0-0)          | 0 (0-0)          | 0 (0-0)          | 0 (0-0)          | 0 (0-0)          | 0 (0-0)          | 0 (0-0)          | 0 (0-0)          | 0 (0-0)          | 0 (0-0)          |
| GBR   | 0 (0-0)          | 0 (0-0)          | 0 (0-0)          | 0 (0-0)          | 0 (0-0)          | 0 (0-0)          | 0 (0-0)          | 0 (0-0)          | 0 (0-0)          | 0 (0-0)          |
| FIN   | 0 (0-0)          | 0 (0-0)          | 0 (0-0)          | 0 (0-0)          | 0 (0-0)          | 0 (0-0)          | 0 (0-0)          | 0 (0-0)          | 0 (0-0)          | 0 (0-0)          |
| CHI   | 0 (0-0)          | 0 (0-0)          | 0 (0-0)          | 0 (0-0)          | 0 (0-0)          | 0 (0-0)          | 0 (0-0)          | 0 (0-0)          | 0 (0-0)          | 0 (0-0)          |
| JPT   | 0 (0-0)          | 0 (0-0)          | 0 (0-0)          | 0 (0-0)          | 0 (0-0)          | 0 (0-0)          | 0 (0-0)          | 0 (0-0)          | 0 (0-0)          | 0 (0-0)          |
| Group | TSI              | IBS              | CEU              | GBR              | FIN              | CHI              | JPT              |                  |                  |                  |
| YRI   | 0 (0-0)          | 0 (0-0)          | 0 (0-0)          | 0 (0-0)          | 0 (0-0)          | 0 (0-0)          | 0 (0-0)          |                  |                  |                  |
| LWK   | 0 (0-0)          | 0 (0-0)          | 0 (0-0)          | 0 (0-0)          | 0 (0-0)          | 0 (0-0)          | 0 (0-0)          |                  |                  |                  |
| MKK   | 0 (0-0)          | 0 (0-0)          | 0 (0-0)          | 0 (0-0)          | 0 (0-0)          | 0 (0-0)          | 0 (0-0)          |                  |                  |                  |
| ANU   | 0 (0-0)          | 0 (0-0)          | 0 (0-0)          | 0 (0-0)          | 0 (0-0)          | 0 (0-0)          | 0 (0-0)          |                  |                  |                  |
| GUM   | 0 (0-0)          | 0 (0-0)          | 0 (0-0)          | 0 (0-0)          | 0 (0-0)          | 0 (0-0)          | 0 (0-0)          |                  |                  |                  |
| ARib  | 0 (0-0)          | 0 (0-0)          | 0 (0-0)          | 0 (0-0)          | 0 (0-0)          | 0 (0-0)          | 0 (0-0)          |                  |                  |                  |
| ARic  | 0 (0-0)          | 0 (0-0)          | 0 (0-0)          | 0 (0-0)          | 0 (0-0)          | 0 (0-0)          | 0 (0-0)          |                  |                  |                  |
| ORO   | 0 (0-0)          | 0 (0-0)          | 0 (0-0)          | 0 (0-0)          | 0 (0-0)          | 0 (-0.1-0.2)     | 0.1 (-0.1-0.2)   |                  |                  |                  |
| SOM   | 0 (0-0)          | 0 (0-0)          | 0 (0-0)          | 0 (0-0)          | 0 (0-0)          | 0 (0-0)          | 0 (0-0)          |                  |                  |                  |
| AFA   | 5.1 (4.6-5.5)    | 0 (0-0)          | 0 (0-0)          | 0 (0-0)          | 0 (0-0)          | 0 (0-0)          | 0 (0-0)          |                  |                  |                  |
| TSI   | 7.9 (7.4-8.5)    | 92.1 (91.5-92.6) | 0 (0-0)          | 0 (0-0)          | 0 (0-0)          | 0 (0-0)          | 0 (0-0)          |                  |                  |                  |
| IBS   | 37.4 (35.1-39.6) | 2.2 (1.9-2.4)    | 55.7 (52.6-58.8) | 1.6 (-0.5-3.6)   | 0 (0-0)          | 0.8 (0.6-1)      | 0.1 (-0.1-0.2)   |                  |                  |                  |
| CEU   | 0 (0-0)          | 45.3 (40.6-50)   | 2.5 (2.1-2.8)    | 48.3 (42.9-53.7) | 3.9 (3.1-4.6)    | 0 (0-0)          | 0 (0-0)          |                  |                  |                  |
| GBR   | 0 (0-0)          | 0 (0-0)          | 93.8 (93.1-94.6) | 5.6 (5.1-6.1)    | 0.6 (0-1.2)      | 0 (0-0)          | 0 (0-0)          |                  |                  |                  |
| FIN   | 0 (0-0)          | 0 (0-0)          | 53.7 (52.8-54.5) | 0 (0-0)          | 46.3 (45.5-47.2) | 0 (0-0)          | 0 (0-0)          |                  |                  |                  |
| CHI   | 0 (0-0)          | 0 (0-0)          | 0 (0-0)          | 0 (0-0)          | 0 (0-0)          | 46.7 (45.8-47.6) | 53.3 (52.4-54.2) |                  |                  |                  |
| JPT   | 0 (0-0)          | 0 (0-0)          | 0 (0-0)          | 0 (0-0)          | 0 (0-0)          | 70.1 (69.4-70.8) | 29.9 (29.2-30.6) |                  |                  |                  |
