# Supplementary material for: Evidence for a Common Origin of Blacksmiths and Cultivators in the Ethiopian Ari within the Last 4500 Years: Lessons for Clustering-Based Inference
Source: PubMed Central journal article supplement (PMC4546361; doi:10.1371/journal.pgen.1005397), 2015-08-20
Supplement: pgen.1005397.s011.pdf [file pgen.1005397.s011.pdf]

| Group | YRI              | LWK              | MKK              | ANU              | GUM              | ORO             | SOM              | AFA              | TSI              | IBS              |
|-------|------------------|------------------|------------------|------------------|------------------|-----------------|------------------|------------------|------------------|------------------|
| YRI   | 56.9 (56.1-57.7) | 43.1 (42.3-43.9) | 0 (0-0)          | 0 (0-0)          | 0 (0-0)          | 0 (0-0)         | 0 (0-0)          | 0 (0-0)          | 0 (0-0)          | 0 (0-0)          |
| LWK   | 38.6 (37.9-39.4) | 59.7 (58.7-60.7) | 0 (0-0)          | 1.7 (1.1-2.2)    | 0 (0-0)          | 0 (0-0)         | 0 (0-0)          | 0 (0-0)          | 0 (0-0)          | 0 (0-0)          |
| MKK   | 1 (0.5-1.4)      | 19.4 (18.5-20.3) | 14.8 (12.9-16.6) | 19.4 (15.3-23.5) | 0 (0-0)          | 35.5 (1.6-69.5) | 0 (0-0)          | 10 (-19.8-39.8)  | 0 (0-0)          | 0 (0-0)          |
| ANU   | 10.1 (9.8-10.4)  | 13.3 (12.9-13.8) | 15.7 (14.5-16.9) | 0 (0-0)          | 57.5 (56.1-59)   | 0 (0-0)         | 3.3 (2.7-3.9)    | 0 (0-0)          | 0 (0-0)          | 0 (0-0)          |
| GUM   | 0 (0-0)          | 0 (0-0)          | 0 (0-0)          | 99.2 (98.9-99.6) | 0 (0-0)          | 0 (0-0)         | 0 (0-0)          | 0 (0-0)          | 0 (0-0)          | 0 (0-0)          |
| ARiB  | 0 (0-0)          | 0 (0-0)          | 22.2 (20.9-23.4) | 19 (17.8-20.2)   | 0 (0-0)          | 0 (0-0)         | 12.4 (11.2-13.7) | 45.3 (43.5-47)   | 0 (0-0)          | 0 (0-0)          |
| ARiC  | 0.9 (0.7-1.2)    | 0 (0-0)          | 21.6 (20.4-22.8) | 17.3 (16.4-18.1) | 0 (0-0)          | 0 (0-0)         | 11.9 (10.9-12.9) | 46.1 (44.4-47.7) | 0 (0-0)          | 0 (0-0)          |
| ORO   | 0 (-0.4-0.4)     | 0 (0-0)          | 3.3 (2.3-4.2)    | 9.4 (7.2-11.7)   | 0.4 (-0.7-1.5)   | 0 (0-0)         | 12.2 (10.6-13.7) | 74.3 (72.3-76.3) | 0 (0-0)          | 0 (0-0)          |
| SOM   | 0 (0-0)          | 0 (0-0)          | 0 (0-0)          | 0 (0-0)          | 0 (0-0)          | 76.1 (75-77.2)  | 23.9 (22.8-25)   | 0 (0-0)          | 0 (0-0)          | 0 (0-0)          |
| AFA   | 0 (0-0)          | 0 (0-0)          | 0 (0-0)          | 0 (0-0)          | 0 (0-0)          | 89.9 (89-90.7)  | 0 (0-0)          | 5.2 (4.5-6)      | 4.5 (3.5-5.6)    | 0 (0-0)          |
| TSI   | 0 (0-0)          | 0 (0-0)          | 0 (0-0)          | 0 (0-0)          | 0 (0-0)          | 0 (0-0)         | 0 (0-0)          | 0 (0-0)          | 7.6 (7-8.1)      | 92.4 (91.9-93)   |
| IBS   | 0.5 (0.3-0.7)    | 0 (-0.1-0.1)     | 0 (0-0)          | 0 (0-0)          | 0 (0-0)          | 0 (0-0)         | 0 (0-0)          | 1.8 (1.4-2.1)    | 38.1 (35.7-40.4) | 1.9 (1.7-2.1)    |
| CEU   | 0 (0-0)          | 0 (0-0)          | 0 (0-0)          | 0 (0-0)          | 0 (0-0)          | 0 (0-0)         | 0 (0-0)          | 0 (0-0)          | 0 (0-0)          | 43.6 (38.8-48.4) |
| GBR   | 0 (0-0)          | 0 (0-0)          | 0 (0-0)          | 0 (0-0)          | 0 (0-0)          | 0 (0-0)         | 0 (0-0)          | 0 (0-0)          | 0 (0-0)          | 0 (0-0)          |
| FIN   | 0 (0-0)          | 0 (0-0)          | 0 (0-0)          | 0 (0-0)          | 0 (0-0)          | 0 (0-0)         | 0 (0-0)          | 0 (0-0)          | 0 (0-0)          | 0 (0-0)          |
| CHI   | 0 (0-0)          | 0 (0-0)          | 0 (0-0)          | 0 (0-0)          | 0 (0-0)          | 0 (0-0)         | 0 (0-0)          | 0 (0-0)          | 0 (0-0)          | 0 (0-0)          |
| JPT   | 0 (0-0)          | 0 (0-0)          | 0 (0-0)          | 0 (0-0)          | 0 (0-0)          | 0 (0-0)         | 0 (0-0)          | 0 (0-0)          | 0 (0-0)          | 0 (0-0)          |
| Group | CEU              | GBR              | FIN              | CHI              | JPT              |                 |                  |                  |                  |                  |
| YRI   | 0 (0-0)          | 0 (0-0)          | 0 (0-0)          | 0 (0-0)          | 0 (0-0)          |                 |                  |                  |                  |                  |
| LWK   | 0 (0-0)          | 0 (0-0)          | 0 (0-0)          | 0 (0-0)          | 0 (0-0)          |                 |                  |                  |                  |                  |
| MKK   | 0 (0-0)          | 0 (0-0)          | 0 (0-0)          | 0 (0-0)          | 0 (0-0)          |                 |                  |                  |                  |                  |
| ANU   | 0 (0-0)          | 0 (0-0)          | 0 (0-0)          | 0 (0-0)          | 0 (0-0)          |                 |                  |                  |                  |                  |
| GUM   | 0 (0-0)          | 0 (0-0)          | 0.5 (0.3-0.7)    | 0.3 (0.2-0.5)    | 0 (0-0)          |                 |                  |                  |                  |                  |
| ARiB  | 0 (0-0)          | 0 (0-0)          | 0 (0-0)          | 1.1 (0.9-1.3)    | 0 (0-0)          |                 |                  |                  |                  |                  |
| ARiC  | 0 (0-0)          | 0 (0-0)          | 0 (0-0)          | 1.9 (1.7-2.1)    | 0.3 (0.1-0.4)    |                 |                  |                  |                  |                  |
| ORO   | 0 (0-0)          | 0 (0-0)          | 0 (0-0)          | 0.3 (0.2-0.5)    | 0.1 (-0.1-0.2)   |                 |                  |                  |                  |                  |
| SOM   | 0 (0-0)          | 0 (0-0)          | 0 (0-0)          | 0 (0-0)          | 0 (0-0)          |                 |                  |                  |                  |                  |
| AFA   | 0.4 (-0.6-1.3)   | 0 (0-0)          | 0 (0-0)          | 0 (0-0)          | 0 (0-0)          |                 |                  |                  |                  |                  |
| TSI   | 0 (0-0)          | 0 (0-0)          | 0 (0-0)          | 0 (0-0)          | 0 (0-0)          |                 |                  |                  |                  |                  |
| IBS   | 54.7 (51.7-57.7) | 1.6 (-0.3-3.6)   | 0 (0-0)          | 0.2 (-0.1-0.5)   | 1.2 (1-1.5)      |                 |                  |                  |                  |                  |
| CEU   | 2.9 (2.5-3.3)    | 49.8 (44.2-55.4) | 3.7 (2.9-4.5)    | 0 (0-0)          | 0 (0-0)          |                 |                  |                  |                  |                  |
| GBR   | 93.2 (92.4-94)   | 5.9 (5.4-6.4)    | 0.9 (0.3-1.5)    | 0 (0-0)          | 0 (0-0)          |                 |                  |                  |                  |                  |
| FIN   | 54.6 (53.8-55.5) | 0 (0-0)          | 45.4 (44.5-46.2) | 0 (0-0)          | 0 (0-0)          |                 |                  |                  |                  |                  |
| CHI   | 0 (0-0)          | 0 (0-0)          | 0 (0-0)          | 46.5 (45.6-47.4) | 53.5 (52.6-54.4) |                 |                  |                  |                  |                  |
| JPT   | 0 (0-0)          | 0 (0-0)          | 0 (0-0)          | 70.7 (70-71.4)   | 29.3 (28.6-30)   |                 |                  |                  |                  |                  |
