# Supplementary material for: Evidence for a Common Origin of Blacksmiths and Cultivators in the Ethiopian Ari within the Last 4500 Years: Lessons for Clustering-Based Inference
Source: PubMed Central journal article supplement (PMC4546361; doi:10.1371/journal.pgen.1005397), 2015-08-20
Supplement: pgen.1005397.s013.pdf [file pgen.1005397.s013.pdf]

| Group | Median unpruned PI HAT     | Median pruned PI HAT       |
|-------|----------------------------|----------------------------|
| CEU   | 0.082 (0.075-0.09)         | 0.149 (0.143-0.156)        |
| GBR   | 0.127 (0.12-0.137)         | 0.209 (0.204-0.216)        |
| CHI   | 0.12 (0.114-0.127)         | 0.203 (0.197-0.209)        |
| FIN   | 0.09 (0.084-0.098)         | 0.163 (0.157-0.169)        |
| IBS   | 0.14 (0.132-0.153)         | 0.225 (0.219-0.236)        |
| JPT   | 0.151 (0.145-0.16)         | 0.237 (0.232-0.243)        |
| LWK   | 0.037 (0.031-0.045)        | 0.064 (0.058-0.072)        |
| TSI   | 0.08 (0.074-0.086)         | 0.147 (0.142-0.153)        |
| YRI   | 0.054 (0.049-0.06)         | 0.079 (0.074-0.086)        |
| MKK   | 0.055 (0.048-0.076)        | 0.098 (0.092-0.119)        |
| AFA   | 0.034 (0-0.044)            | 0.071 (0.061-0.081)        |
| ORO   | 0.1 (0.095-0.106)          | 0.166 (0.161-0.172)        |
| SOM   | 0.056 (0.048-0.065)        | 0.103 (0.094-0.112)        |
| GUM   | 0.149 (0.138-0.162)        | 0.196 (0.189-0.208)        |
| ANU   | 0.074 (0.062-0.086)        | 0.107 (0.092-0.12)         |
| AR1b  | <b>0.179 (0.168-0.218)</b> | <b>0.241 (0.233-0.278)</b> |
| AR1c  | <b>0.084 (0.075-0.092)</b> | <b>0.14 (0.133-0.149)</b>  |
