# Supplementary material for: Evidence for a Common Origin of Blacksmiths and Cultivators in the Ethiopian Ari within the Last 4500 Years: Lessons for Clustering-Based Inference
Source: PubMed Central journal article supplement (PMC4546361; doi:10.1371/journal.pgen.1005397), 2015-08-20
Supplement: pgen.1005397.s015.pdf [file pgen.1005397.s015.pdf]

| (A) all-donors        |       |       |               |               |       |       |       |
|-----------------------|-------|-------|---------------|---------------|-------|-------|-------|
| Group                 | ANU   | GUM   | AR <b>I</b> b | AR <b>I</b> c | ORO   | SOM   | AFA   |
| ANU                   | 0     | 0.249 | 0.464         | 0.379         | 0.386 | 0.42  | 0.422 |
| GUM                   | 0.249 | 0     | 0.414         | 0.318         | 0.329 | 0.385 | 0.378 |
| AR <b>I</b> b         | 0.464 | 0.414 | 0             | <b>0.307</b>  | 0.385 | 0.438 | 0.425 |
| AR <b>I</b> c         | 0.379 | 0.318 | <b>0.307</b>  | 0             | 0.201 | 0.283 | 0.269 |
| ORO                   | 0.386 | 0.329 | 0.385         | 0.201         | 0     | 0.17  | 0.076 |
| SOM                   | 0.42  | 0.385 | 0.438         | 0.283         | 0.17  | 0     | 0.179 |
| AFA                   | 0.422 | 0.378 | 0.425         | 0.269         | 0.076 | 0.179 | 0     |
| (B) non-Ari-donors    |       |       |               |               |       |       |       |
| Group                 | ANU   | GUM   | AR <b>I</b> b | AR <b>I</b> c | ORO   | SOM   | AFA   |
| ANU                   | 0     | 0.137 | 0.26          | 0.265         | 0.34  | 0.393 | 0.387 |
| GUM                   | 0.137 | 0     | 0.258         | 0.262         | 0.318 | 0.371 | 0.365 |
| AR <b>I</b> b         | 0.26  | 0.258 | 0             | <b>0.017</b>  | 0.12  | 0.199 | 0.166 |
| AR <b>I</b> c         | 0.265 | 0.262 | <b>0.017</b>  | 0             | 0.111 | 0.192 | 0.155 |
| ORO                   | 0.34  | 0.318 | 0.12          | 0.111         | 0     | 0.161 | 0.06  |
| SOM                   | 0.393 | 0.371 | 0.199         | 0.192         | 0.161 | 0     | 0.175 |
| AFA                   | 0.387 | 0.365 | 0.166         | 0.155         | 0.06  | 0.175 | 0     |
| (C) non-Pagani-donors |       |       |               |               |       |       |       |
| Group                 | ANU   | GUM   | AR <b>I</b> b | AR <b>I</b> c | ORO   | SOM   | AFA   |
| ANU                   | 0     | 0.09  | 0.188         | 0.203         | 0.285 | 0.259 | 0.342 |
| GUM                   | 0.09  | 0     | 0.101         | 0.113         | 0.195 | 0.173 | 0.253 |
| AR <b>I</b> b         | 0.188 | 0.101 | 0             | <b>0.015</b>  | 0.101 | 0.083 | 0.155 |
| AR <b>I</b> c         | 0.203 | 0.113 | <b>0.015</b>  | 0             | 0.089 | 0.075 | 0.144 |
| ORO                   | 0.285 | 0.195 | 0.101         | 0.089         | 0     | 0.025 | 0.058 |
| SOM                   | 0.259 | 0.173 | 0.083         | 0.075         | 0.025 | 0     | 0.083 |
| AFA                   | 0.342 | 0.253 | 0.155         | 0.144         | 0.058 | 0.083 | 0     |
