# Supplementary material for: Evidence for a Common Origin of Blacksmiths and Cultivators in the Ethiopian Ari within the Last 4500 Years: Lessons for Clustering-Based Inference
Source: PubMed Central journal article supplement (PMC4546361; doi:10.1371/journal.pgen.1005397), 2015-08-20
Supplement: pgen.1005397.s016.pdf [file pgen.1005397.s016.pdf]

| (A) all-donors        |        |        |               |               |        |        |        |
|-----------------------|--------|--------|---------------|---------------|--------|--------|--------|
| Group                 | ANU    | GUM    | AR <b>I</b> b | AR <b>I</b> c | ORO    | SOM    | AFA    |
| ANU                   | 0      | 12.529 | 16.774        | 19.678        | 21.293 | 22.87  | 27.558 |
| GUM                   | 12.529 | 0      | 13.475        | 14.294        | 15.539 | 17.99  | 20.571 |
| AR <b>I</b> b         | 16.774 | 13.475 | 0             | <b>10.198</b> | 13.281 | 14.996 | 16.255 |
| AR <b>I</b> c         | 19.678 | 14.294 | <b>10.198</b> | 0             | 9.774  | 13.635 | 15.157 |
| ORO                   | 21.293 | 15.539 | 13.281        | 9.774         | 0      | 8.649  | 4.578  |
| SOM                   | 22.87  | 17.99  | 14.996        | 13.635        | 8.649  | 0      | 10.625 |
| AFA                   | 27.558 | 20.571 | 16.255        | 15.157        | 4.578  | 10.625 | 0      |
| (B) non-Ari-donors    |        |        |               |               |        |        |        |
| Group                 | ANU    | GUM    | AR <b>I</b> b | AR <b>I</b> c | ORO    | SOM    | AFA    |
| ANU                   | 0      | 7.372  | 14.048        | 16.234        | 20.68  | 22.415 | 26.473 |
| GUM                   | 7.372  | 0      | 12.135        | 13.75         | 16.594 | 18.312 | 21.043 |
| AR <b>I</b> b         | 14.048 | 12.135 | 0             | <b>0.916</b>  | 6.279  | 9.847  | 9.566  |
| AR <b>I</b> c         | 16.234 | 13.75  | <b>0.916</b>  | 0             | 6.555  | 10.639 | 10.23  |
| ORO                   | 20.68  | 16.594 | 6.279         | 6.555         | 0      | 8.865  | 3.941  |
| SOM                   | 22.415 | 18.312 | 9.847         | 10.639        | 8.865  | 0      | 10.744 |
| AFA                   | 26.473 | 21.043 | 9.566         | 10.23         | 3.941  | 10.744 | 0      |
| (C) non-Pagani-donors |        |        |               |               |        |        |        |
| Group                 | ANU    | GUM    | AR <b>I</b> b | AR <b>I</b> c | ORO    | SOM    | AFA    |
| ANU                   | 0      | 6.209  | 11.609        | 14.536        | 20.286 | 16.784 | 27.377 |
| GUM                   | 6.209  | 0      | 6.375         | 8.326         | 14.253 | 11.487 | 20.785 |
| AR <b>I</b> b         | 11.609 | 6.375  | 0             | <b>0.951</b>  | 6.499  | 4.917  | 11.137 |
| AR <b>I</b> c         | 14.536 | 8.326  | <b>0.951</b>  | 0             | 6.747  | 5.091  | 12.312 |
| ORO                   | 20.286 | 14.253 | 6.499         | 6.747         | 0      | 1.726  | 4.896  |
| SOM                   | 16.784 | 11.487 | 4.917         | 5.091         | 1.726  | 0      | 6.297  |
| AFA                   | 27.377 | 20.785 | 11.137        | 12.312        | 4.896  | 6.297  | 0      |
