# Supplementary material for: Evidence for a Common Origin of Blacksmiths and Cultivators in the Ethiopian Ari within the Last 4500 Years: Lessons for Clustering-Based Inference
Source: PubMed Central journal article supplement (PMC4546361; doi:10.1371/journal.pgen.1005397), 2015-08-20
Supplement: pgen.1005397.s017.pdf [file pgen.1005397.s017.pdf]

|             | <b>ANU</b> | <b>GUM</b> | <b>ARIB</b>  | <b>ARIC</b> | <b>ORO</b> | <b>SOM</b> | <b>AFA</b> |
|-------------|------------|------------|--------------|-------------|------------|------------|------------|
| <b>ANU</b>  | NA         | 0.035      | 0            | 0           | 0          | 0          | 0          |
| <b>GUM</b>  | 0          | NA         | 0            | 0           | 0          | 0          | 0          |
| <b>ARIB</b> | 0          | 0          | NA           | <b>0</b>    | 0          | 0          | 0          |
| <b>ARIC</b> | 0          | 0          | <b>0.198</b> | NA          | 0          | 0          | 0          |
| <b>ORO</b>  | 0          | 0          | 0            | 0           | NA         | 0.182      | 0          |
| <b>SOM</b>  | 0          | 0          | 0            | 0           | 0.075      | NA         | 0          |
| <b>AFA</b>  | 0          | 0          | 0            | 0           | 0.003      | 0          | NA         |
