# Supplementary material for: Evidence for a Common Origin of Blacksmiths and Cultivators in the Ethiopian Ari within the Last 4500 Years: Lessons for Clustering-Based Inference
Source: PubMed Central journal article supplement (PMC4546361; doi:10.1371/journal.pgen.1005397), 2015-08-20
Supplement: pgen.1005397.s018.pdf [file pgen.1005397.s018.pdf]

| Simulation        | 50% admixture |       | 75% admixture |       | 90% admixture |       |
|-------------------|---------------|-------|---------------|-------|---------------|-------|
|                   | Pop5b         | Pop5  | Pop5b         | Pop5  | Pop5b         | Pop5  |
| split=1700, BN=20 | 0             | 0     | 0             | 0     | 0             | 0     |
| split=1300, BN=30 | 0             | 0     | 0             | 0     | 0             | 0     |
| split=1200, BN=30 | 0             | 0     | 0             | 0     | 0             | 0.059 |
| split=1100, BN=35 | 0             | 0     | 0.022         | 0.012 | 0             | 0.079 |
| split=1000, BN=35 | 0             | 0.055 | 0.022         | 0.119 | 0.333         | 0.107 |
| split=900, BN=35  | 0.333         | 0.316 | 0.422         | 0.387 | 0.444         | 0.427 |
| split=800, BN=40  | 0.356         | 0.332 | 0.267         | 0.221 | 0.267         | 0.494 |
| split=750, BN=40  | 0.222         | 0.138 | 0.156         | 0.103 | 0.111         | 0.213 |
