# Supplementary material for: Evidence for a Common Origin of Blacksmiths and Cultivators in the Ethiopian Ari within the Last 4500 Years: Lessons for Clustering-Based Inference
Source: PubMed Central journal article supplement (PMC4546361; doi:10.1371/journal.pgen.1005397), 2015-08-20
Supplement: pgen.1005397.s019.pdf [file pgen.1005397.s019.pdf]

| $\delta = 100$  |                |                    |                       |
|-----------------|----------------|--------------------|-----------------------|
| Data            | (A) all-donors | (B) non-Ari-donors | (C) non-Pagani-donors |
| PAGANI DATA     | 1 (1 - 1)      | 0 (0 - 0)          | 0 (0 - 0)             |
| SIMS: MA        | 1 (1 - 1)      | 0 (0 - 0)          | 0 (0 - 0)             |
| SIMS: RN        | 1 (1 - 1)      | 0.96 (0.94 - 0.98) | 1 (0.99 - 1)          |
| SIMS: RN+BN     | 1 (1 - 1)      | 0.93 (0.91 - 0.98) | 0.99 (0.98 - 1)       |
| SIMS: RN+BN+80% | 1 (1 - 1)      | 0 (0 - 0)          | 0.72 (0.66 - 0.81)    |

  

| $\delta = 50$   |                |                    |                       |
|-----------------|----------------|--------------------|-----------------------|
| Data            | (A) all-donors | (B) non-Ari-donors | (C) non-Pagani-donors |
| PAGANI DATA     | 1 (1 - 1)      | 0 (0 - 0)          | 0 (0 - 0)             |
| SIMS: MA        | 1 (1 - 1)      | 0 (0 - 0)          | 0 (0 - 0)             |
| SIMS: RN        | 1 (1 - 1)      | 0.96 (0.93 - 0.99) | 0.99 (0.98 - 1)       |
| SIMS: RN+BN     | 1 (1 - 1)      | 0.94 (0.91 - 0.98) | 0.99 (0.98 - 1)       |
| SIMS: RN+BN+80% | 1 (1 - 1)      | 0.36 (0.3 - 0.38)  | 0.74 (0.69 - 0.78)    |
