# Supplementary material for: Evidence for a Common Origin of Blacksmiths and Cultivators in the Ethiopian Ari within the Last 4500 Years: Lessons for Clustering-Based Inference
Source: PubMed Central journal article supplement (PMC4546361; doi:10.1371/journal.pgen.1005397), 2015-08-20
Supplement: pgen.1005397.s020.pdf [file pgen.1005397.s020.pdf]

| Analysis | Group | First Event  |                       |                          |          |                             |                            |                |          |                    |                            |                                 |  |
|----------|-------|--------------|-----------------------|--------------------------|----------|-----------------------------|----------------------------|----------------|----------|--------------------|----------------------------|---------------------------------|--|
|          |       | Date (gen)   | Date (years)          | %                        | Source 1 |                             | Source 1 Props             | %              | Source 2 |                    | Source 2 Props             |                                 |  |
| A        | ARib  | 52 (27-74)   | 466CE (150BCE-1166CE) | 32                       | SOM      | GBR(16%),ANU(28%),SOM(54%)  |                            | 68             | ARIC     | ARIC(100%)         |                            | CEU(0.06), SOM(0.12)            |  |
|          | ARIC  | 71 (57-83)   | 66BCE (402BCE-326CE)  | 24                       | ARIB     | ANU(15%),GUM(19%),ARIB(53%) |                            | 76             | ORO      | ORO(80%)           |                            | ARIB(0.19)                      |  |
|          |       | Second Event |                       |                          |          |                             |                            |                |          |                    |                            |                                 |  |
|          |       | Date (gen)   | Date (years)          | %                        | Source 1 |                             | Source 1 Props             | %              | Source 2 |                    | Source 2 Props             |                                 |  |
|          | ARIC  | 71 (57-83)   | 66BCE (402BCE-326CE)  | 19                       | ANU      | MKK(11%),GUM(12%),ANU(62%)  |                            | 81             | ORO      | ARIB(18%),ORO(72%) |                            | YRI(0.06), LWK(0.07), ANU(0.12) |  |
| Analysis | Group | First Event  |                       |                          |          |                             |                            |                |          |                    |                            |                                 |  |
|          |       | Date (gen)   | Date (years)          | %                        | Source 1 |                             | Source 1 Props             | %              | Source 2 |                    | Source 2 Props             |                                 |  |
| A-sim    | ARIB  | 62 (44-83)   | 186CE (402BCE-690CE)  | 26                       | ANU      | TSI(26%),ANU(74%)           |                            | 74             | ARIC     | ARIC(97%)          |                            | YRI(0.05), LWK(0.05), ANU(0.11) |  |
|          | ARIC  | 72 (59-88)   | 94BCE (542BCE-270CE)  | 21                       | ARIB     | ANU(38%),ARIB(58%)          |                            | 79             | ORO      | ANU(13%),ORO(83%)  |                            | ARIB(0.2)                       |  |
|          |       | Second Event |                       |                          |          |                             |                            |                |          |                    |                            |                                 |  |
|          |       |              | Date (gen)            | Date (years)             | %        | Source 1                    |                            | Source 1 Props | %        | Source 2           |                            | Source 2 Props                  |  |
|          | ARIB  | 62 (44-83)   | 186CE (402BCE-690CE)  | 42                       | ARIC     | ORO(15%),TSI(22%),ARIC(62%) |                            | 58             | ARIC     | ANU(31%),ARIC(70%) |                            | TSI(0.05), CEU(0.07)            |  |
|          | ARIC  | 72 (59-88)   | 94BCE (542BCE-270CE)  | 25                       | ANU      | ORO(27%),ANU(71%)           |                            | 75             | ORO      | ARIB(19%),ORO(80%) |                            | YRI(0.06), LWK(0.07), ANU(0.13) |  |
| B        | Group | First Event  |                       |                          |          |                             |                            |                |          |                    |                            |                                 |  |
|          |       | Date (gen)   | Date (years)          | %                        | Source 1 |                             | Source 1 Props             | %              | Source 2 |                    | Source 2 Props             |                                 |  |
|          |       | ARIB         | 72 (53-85)            | 94BCE (458BCE-438CE)     | 41       | ANU                         | SOM(16%),ANU(84%)          |                | 59       | AFA                | AFA(90%)                   |                                 |  |
|          | ARIC  | 73 (54-82)   | 122BCE (374BCE-410CE) | 41                       | ANU      | SOM(16%),ANU(84%)           |                            | 59             | AFA      | AFA(100%)          |                            |                                 |  |
| C        | Group | First Event  |                       |                          |          |                             |                            |                |          |                    |                            |                                 |  |
|          |       | Date (gen)   | Date (years)          | %                        | Source 1 |                             | Source 1 Props             | %              | Source 2 |                    | Source 2 Props             |                                 |  |
|          |       | ARIB         | 121 (91-149)          | 1466BCE (2250BCE-626BCE) | 30       | CEU                         | CEU(32%),MKK(46%)          |                | 70       | MKK                | YRI(17%),LWK(20%),MKK(55%) |                                 |  |
|          |       | ARIC         | 100 (85-115)          | 878BCE (1298BCE-458BCE)  | 39       | CEU                         | IBS(14%),CEU(16%),MKK(52%) |                | 61       | MKK                | YRI(19%),LWK(20%),MKK(52%) |                                 |  |
