# Supplementary material for: Evidence for a Common Origin of Blacksmiths and Cultivators in the Ethiopian Ari within the Last 4500 Years: Lessons for Clustering-Based Inference
Source: PubMed Central journal article supplement (PMC4546361; doi:10.1371/journal.pgen.1005397), 2015-08-20
Supplement: pgen.1005397.s021.pdf [file pgen.1005397.s021.pdf]

| Analysis | Group | First Event   |                           |    |              |                             |   |                |                      |          |                |                              |                               |  |
|----------|-------|---------------|---------------------------|----|--------------|-----------------------------|---|----------------|----------------------|----------|----------------|------------------------------|-------------------------------|--|
|          |       | Date (gen)    | Date (years)              | %  | Source 1     |                             |   | Source 1 Props | %                    | Source 2 |                | Source 2 Props               |                               |  |
| A*       | AR1b  | 82 (62-106)   | 374BCE (1046BCE-186CE)    | 22 | SOM          | GBR(37%),SOM(63%)           |   |                | LWK(0.06),ARIc(0.09) | 78       | ARIc           | ARIc(87%)                    | FIN(0.06),SOM(0.10),CEU(0.11) |  |
|          | AR1c  | 78 (61-94)    | 262BCE (710BCE-214CE)     | 27 | AR1b         | ANU(17%),GUM(18%),AR1b(53%) |   |                | AFA(0.09)            | 73       | ORO            | ORO(81%)                     | AR1b(0.19)                    |  |
|          |       |               |                           |    | Second Event |                             |   |                |                      |          |                |                              |                               |  |
|          |       |               |                           |    | Date (gen)   | Date (years)                | % | Source 1       |                      |          | Source 1 Props | %                            | Source 2                      |  |
|          | AR1b  | Same          | Same                      | 49 | SOM          | ANU(24%),SOM(71%)           |   |                | ARIc(0.08)           | 51       | AFA            | GUM(18%),MKK( 24%),AFA( 59%) | LWK(0.06),SOM(0.1)            |  |
|          | AR1c  | Same          | Same                      | 48 | SOM          | ANU(15%),SOM(76%)           |   |                | AR1b(0.08),AFA(0.09) | 52       | AFA            | MKK(43%),AFA(57%)            | YRI(0.08),LWK(0.1),ANU(0.12)  |  |
| B*       | Group |               |                           |    | First Event  |                             |   |                |                      |          |                |                              |                               |  |
|          |       |               |                           |    | Date (gen)   | Date (years)                | % | Source 1       |                      |          | %              | Source 2                     |                               |  |
|          | AR1b  | 72 (53-85)    | 94BCE (458BCE-438CE)      | 41 | ANU          | SOM(16%),ANU(84%)           |   |                |                      | 59       | AFA            | AFA(90%)                     |                               |  |
|          | AR1c  | 109 (88-130)  | 1130BCE (1718BCE-542BCE)  | 40 | ANU          | ANU(94%)                    |   |                |                      | 60       | AFA            | AFA(100%)                    |                               |  |
| C*       | Group |               |                           |    | First Event  |                             |   |                |                      |          |                |                              |                               |  |
|          |       |               |                           |    | Date (gen)   | Date (years)                | % | Source 1       |                      |          | %              | Source 2                     |                               |  |
|          | AR1b  | 121 (91-149)  | 1466BCE (2250BCE-626BCE)  | 30 | CEU          | CEU(32%),MKK(46%)           |   |                |                      | 70       | MKK            | YRI(17%),LWK(20%),MKK(55%)   |                               |  |
|          | AR1c  | 138 (118-153) | 1942BCE (2362BCE-1382BCE) | 41 | CEU          | GBR(46%),MKK(47%)           |   |                |                      | 59       | LWK            | YRI(24%),LWK(30%),MKK(36%)   |                               |  |
