# Supplementary material for: Evidence for a Common Origin of Blacksmiths and Cultivators in the Ethiopian Ari within the Last 4500 Years: Lessons for Clustering-Based Inference
Source: PubMed Central journal article supplement (PMC4546361; doi:10.1371/journal.pgen.1005397), 2015-08-20
Supplement: pgen.1005397.s022.pdf [file pgen.1005397.s022.pdf]

| Analysis | Group | First Event  |                          |    |              |                                     |   |                |                      |          |                |                |                             |  |                      |       |         |
|----------|-------|--------------|--------------------------|----|--------------|-------------------------------------|---|----------------|----------------------|----------|----------------|----------------|-----------------------------|--|----------------------|-------|---------|
|          |       | Date (gen)   | Date (years)             | %  | Source 1     |                                     |   | Source 1 Props | %                    | Source 2 |                | Source 2 Props | $R_E$                       |  |                      |       |         |
| A        | ARIB  | 13 (1-25)    | 1599CE (1233CE-1894CE)   | 18 | ORO          | ORO(17%),GUM(18%),ANU(24%),AFA(34%) |   |                | ORO(0.01),ARIC(0.16) |          | 82             | ARIC           | ARIC(84%)                   |  | AFA(0.04),ANU(0.05)  | 0.492 |         |
|          | ARIC  | 8 (1-16)     | 1718CE (1483CE-1894CE)   | 16 | ARIB         | GUM(13%),ARIB(28%),ORO(38%)         |   |                | TSI(0.01),AFA(0.01)  |          | 84             | ORO            | ARIB(11%),ORO(65%)          |  | GUM(0.03),ANU(0.04)  | 0.683 |         |
|          |       |              |                          |    | Second Event |                                     |   |                |                      |          |                |                |                             |  |                      |       |         |
|          |       |              |                          |    | Date (gen)   | Date (years)                        | % | Source 1       |                      |          | Source 1 Props | %              | Source 2                    |  | Source 2 Props       | $R_E$ | $R_2^*$ |
|          | ARIB  | 111 (65-156) | 1145BCE (2449BCE-100CE)  | 33 | SOM          | GBR(23%),SOM(73%)                   |   |                | LWK(0.03),ARIC(0.20) |          | 67             | ARIC           | ARIC(100%)                  |  | CEU(0.07),SOM(0.13)  | 0.52  | 0.056   |
|          | ARIC  | 109 (84-131) | 1109BCE (1733BCE-440BCE) | 29 | ARIB         | ANU(11%),GUM(17%),ARIB(56%)         |   |                | CEU(0.03),AFA(0.06)  |          | 71             | ORO            | ORO(29%),AFA(45%)           |  | GUM(0.05),ARIC(0.07) | 0.721 | 0.119   |
| Analysis | Group | First Event  |                          |    |              |                                     |   |                |                      |          |                |                |                             |  |                      |       |         |
|          |       | Date (gen)   | Date (years)             | %  | Source 1     |                                     |   | Source 1 Props | %                    | Source 2 |                | Source 2 Props | $R_E$                       |  |                      |       |         |
| A-sim    | ARIB  | 15 (1-24)    | 1541CE (1257CE-1894CE)   | 10 | ANU          | ORO(31%),ANU(59%)                   |   |                | AFA(0.03),ARIC(0.15) |          | 90             | ARIC           | ORO(23%),ARIC(75%)          |  | LWK(0.05),ANU(0.09)  | 0.434 |         |
|          | ARIC  | 7 (1-17)     | 1756CE (1438CE-1894CE)   | 32 | ORO          | ANU(13%),ORO(80%)                   |   |                | ANU(0.02),ARIC(0.02) |          | 68             | ORO            | ARIB(18%),ANU(20%),ORO(61%) |  | TSI(0.01),AFA(0.01)  | 0.694 |         |
|          |       |              |                          |    | Second Event |                                     |   |                |                      |          |                |                |                             |  |                      |       |         |
|          |       |              |                          |    | Date (gen)   | Date (years)                        | % | Source 1       |                      |          | Source 1 Props | %              | Source 2                    |  | Source 2 Props       | $R_E$ | $R_2^*$ |
|          | ARIB  | 118 (76-160) | 1355BCE (2541BCE-201BCE) | 24 | TSI          | ANU(48%),TSI(52%)                   |   |                | AFA(0.06),ARIC(0.2)  |          | 76             | ARIC           | ARIC(99%)                   |  | TSI(0.09),CEU(0.11)  | 0.472 | 0.067   |
|          | ARIC  | 108 (90-590) | 1063BCE (2078BCE-590BCE) | 24 | ARIB         | ANU(37%),ARIB(62%)                  |   |                | CEU(0.03),AFA(0.06)  |          | 76             | ORO            | ANU(12%),ORO(87%)           |  | ANU(0.05),ARIC(0.06) | 0.727 | 0.108   |
| Analysis | Group | First Event  |                          |    |              |                                     |   |                |                      |          |                |                |                             |  |                      |       |         |
|          |       | Date (gen)   | Date (years)             | %  | Source 1     |                                     |   | Source 1 Props | %                    | Source 2 |                | Source 2 Props | $R_E$                       |  |                      |       |         |
| B        | ARIB  | 14 (1-32)    | 1552CE (1028CE-1894CE)   | 41 | ORO          | ORO(92%)                            |   |                | ANU(0.02),LWK(0.03)  |          | 59             | MKK            | GUM(16%),SOM(40%),MKK(42%)  |  | CEU(0.01),AFA(0.02)  | 0.395 |         |
|          | ARIC  | 9 (3-17)     | 1696CE (1451CE-1826CE)   | 40 | MKK          | GUM(18%),SOM(40%),MKK(42%)          |   |                | CEU(0.01),AFA(0.02)  |          | 60             | ORO            | SOM(14%),MKK(14%),ORO(72%)  |  | LWK(0.02),ANU(0.02)  | 0.67  |         |
|          |       |              |                          |    | Second Event |                                     |   |                |                      |          |                |                |                             |  |                      |       |         |
|          |       |              |                          |    | Date (gen)   | Date (years)                        | % | Source 1       |                      |          | Source 1 Props | %              | Source 2                    |  | Source 2 Props       | $R_E$ | $R_2^*$ |
|          | ARIB  | 105 (57-155) | 996BCE (2419BCE-328CE)   | 34 | ANU          | ANU(100%)                           |   |                | CEU(0.05),AFA(0.05)  |          | 66             | AFA            | SOM(19%),AFA(81%)           |  | LWK(0.08),ANU(0.09)  | 0.409 | 0.023   |
|          | ARIC  | 100 (85-125) | 849BCE (1565BCE-451BCE)  | 37 | ANU          | ANU(95%)                            |   |                | AFA(0.06)            |          | 63             | AFA            | AFA(100%)                   |  | LWK(0.07),ANU(0.09)  | 0.695 | 0.077   |
