# Supplementary material for: Evidence for a Common Origin of Blacksmiths and Cultivators in the Ethiopian Ari within the Last 4500 Years: Lessons for Clustering-Based Inference
Source: PubMed Central journal article supplement (PMC4546361; doi:10.1371/journal.pgen.1005397), 2015-08-20
Supplement: pgen.1005397.s023.pdf [file pgen.1005397.s023.pdf]

| <b>Simulation</b> | $F_{ST}$ (Pop4, Pop5) | $F_{ST}$ (Pop5, Pop5b) | $F_{ST}$ (Pop4, Pop5b) |
|-------------------|-----------------------|------------------------|------------------------|
| split*=300, BN=30 | 0.0136                | 0.0154                 | 0.0279                 |
| split*=400, BN=30 | 0.0136                | 0.0154                 | 0.0279                 |
| split*=500, BN=30 | 0.0136                | 0.0154                 | 0.0279                 |
| split*=300, BN=35 | 0.0139                | 0.0173                 | 0.0304                 |
| split*=400, BN=35 | 0.0139                | 0.0173                 | 0.0304                 |
| split*=500, BN=35 | 0.0139                | 0.0173                 | 0.0304                 |
