# Supplementary material for: Evidence for a Common Origin of Blacksmiths and Cultivators in the Ethiopian Ari within the Last 4500 Years: Lessons for Clustering-Based Inference
Source: PubMed Central journal article supplement (PMC4546361; doi:10.1371/journal.pgen.1005397), 2015-08-20
Supplement: pgen.1005397.s024.pdf [file pgen.1005397.s024.pdf]

| <b>Simulation</b> | <b>Pop5b</b> | <b>Pop5</b> |
|-------------------|--------------|-------------|
| split*=300, BN=30 | 0.427        | 0.219       |
| split*=400, BN=30 | 0.470        | 0.371       |
| split*=500, BN=30 | 0.51         | 0.324       |
| split*=300, BN=35 | 0.36         | 0.428       |
| split*=400, BN=35 | 0.437        | 0.39        |
| split*=500, BN=35 | 0.463        | 0.352       |
