# Supplementary material for: Evidence for a Common Origin of Blacksmiths and Cultivators in the Ethiopian Ari within the Last 4500 Years: Lessons for Clustering-Based Inference
Source: PubMed Central journal article supplement (PMC4546361; doi:10.1371/journal.pgen.1005397), 2015-08-20
Supplement: pgen.1005397.s025.pdf [file pgen.1005397.s025.pdf]

| <b>X</b>   | <b>Y</b>   | <i>D</i> -statistic | <i>Z</i> statistic |
|------------|------------|---------------------|--------------------|
| <b>LWK</b> | <b>YRI</b> | 0.0004              | 2.803              |
| <b>ANU</b> | <b>LWK</b> | -0.0003             | -2.005             |
| <b>GUM</b> | <b>LWK</b> | -0.0004             | -1.759             |
| <b>ANU</b> | <b>GUM</b> | 0.0001              | 0.449              |
| <b>GUM</b> | <b>YRI</b> | -0.0001             | -0.264             |
| <b>ANU</b> | <b>YRI</b> | 0.0000              | 0.099              |
