# Supplementary material for: Evidence for a Common Origin of Blacksmiths and Cultivators in the Ethiopian Ari within the Last 4500 Years: Lessons for Clustering-Based Inference
Source: PubMed Central journal article supplement (PMC4546361; doi:10.1371/journal.pgen.1005397), 2015-08-20
Supplement: pgen.1005397.s031.pdf [file pgen.1005397.s031.pdf]

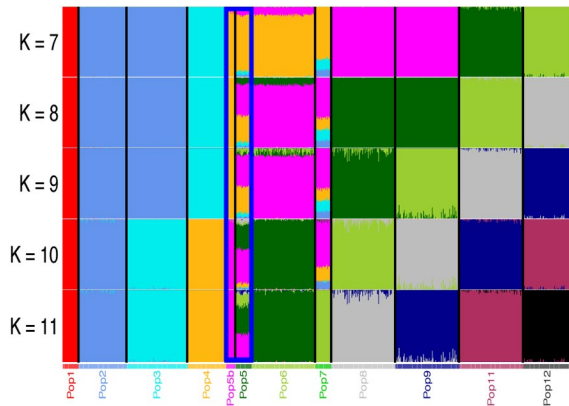

(a) MA "full" simulations

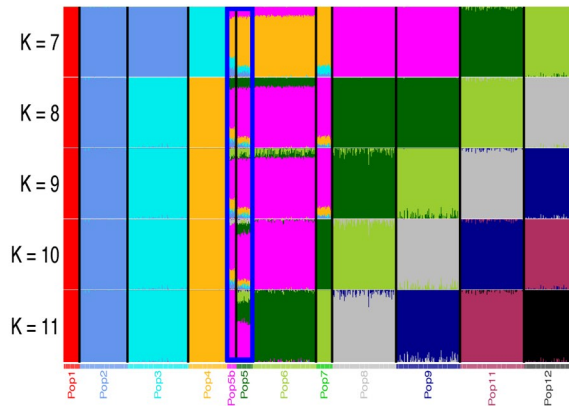

(b) RN "full" simulations

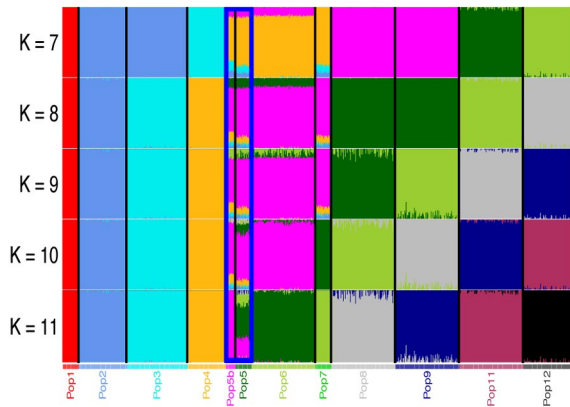

(c) RN+BN "full" simulations

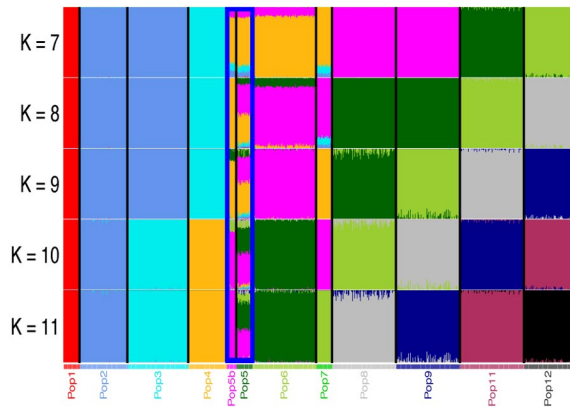

(d) RN+BN+80% "full" simulations
