# Supplementary material for: Evidence for a Common Origin of Blacksmiths and Cultivators in the Ethiopian Ari within the Last 4500 Years: Lessons for Clustering-Based Inference
Source: PubMed Central journal article supplement (PMC4546361; doi:10.1371/journal.pgen.1005397), 2015-08-20

**(A) MA, all**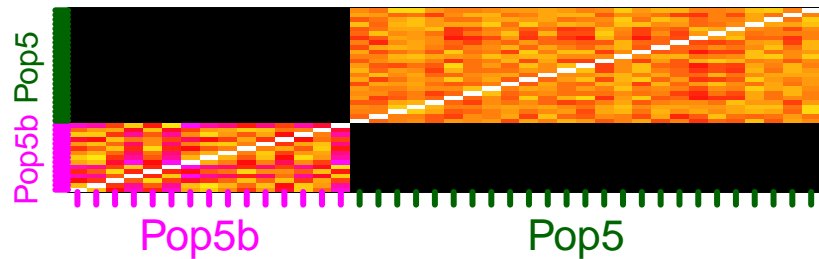**(B) MA, non-Ari**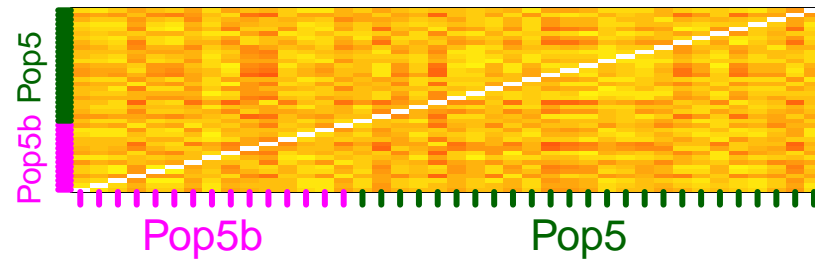**(C) MA, non-Pagani**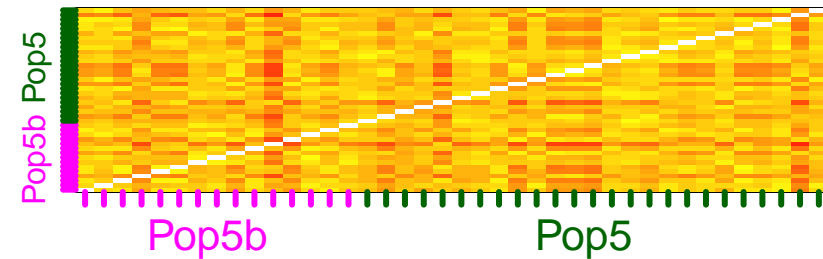**(A) RN, all**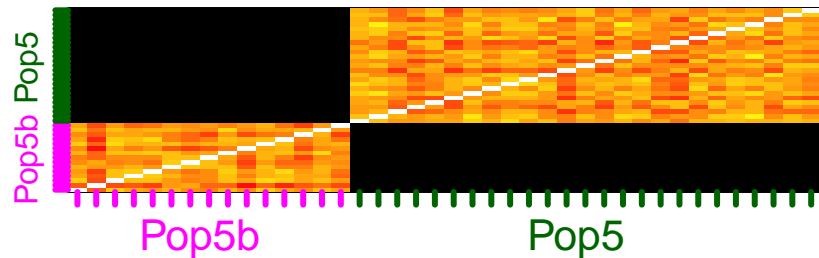**(B) RN, non-Ari**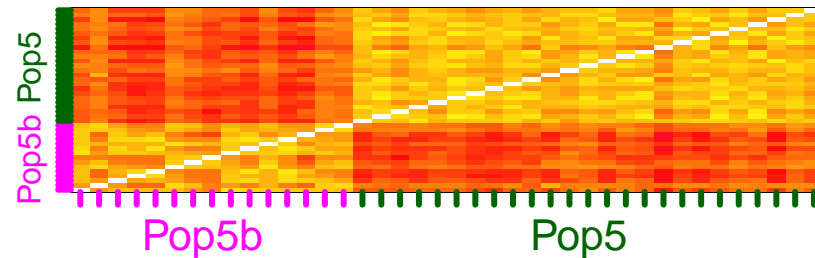**(C) RN, non-Pagani**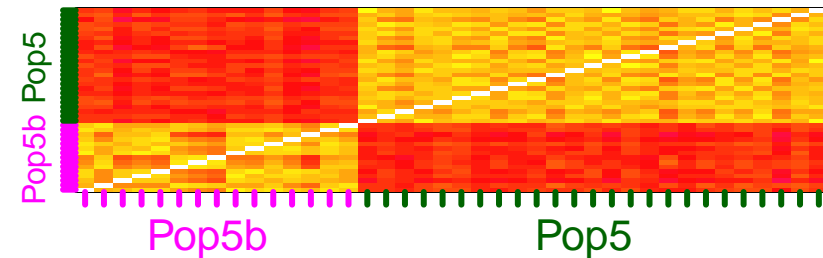**(A) RN+BN, all**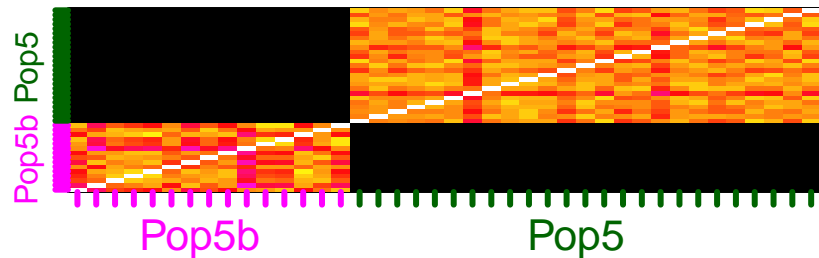**(B) RN+BN, non-Ari**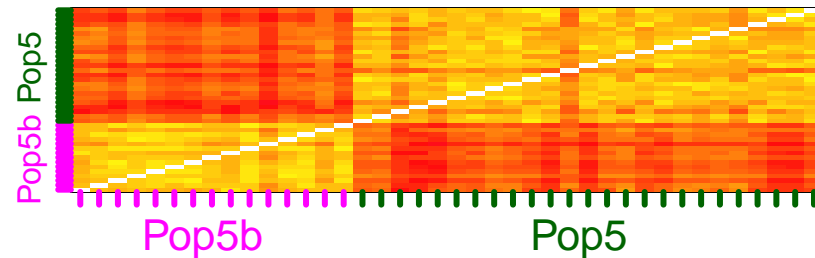**(C) RN+BN, non-Pagani**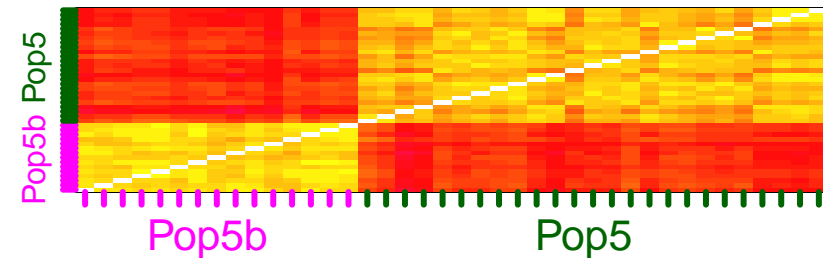**(A) RN+BN+80%, all**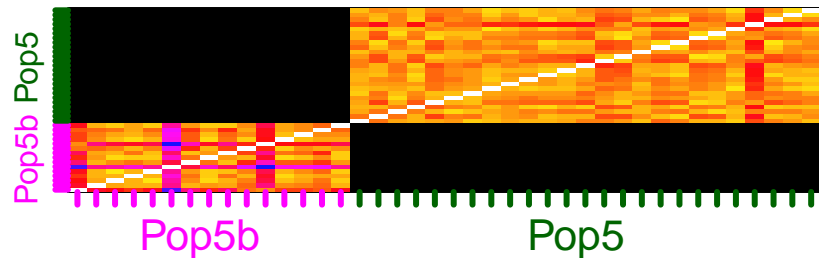**(B) RN+BN+80%, non-Ari**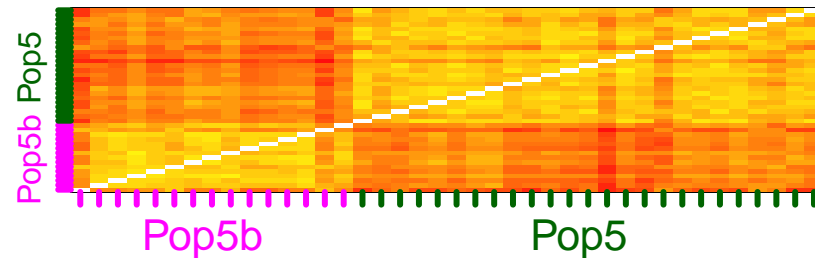**(C) RN+BN+80%, non-Pagani**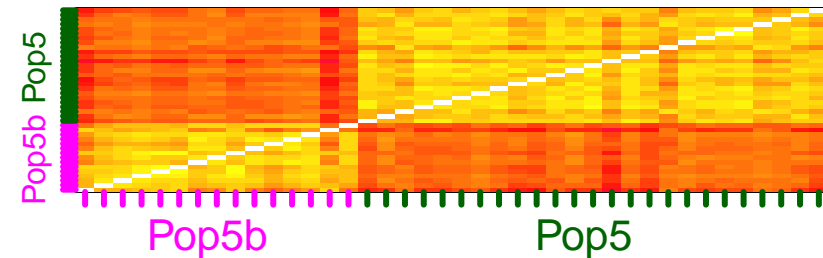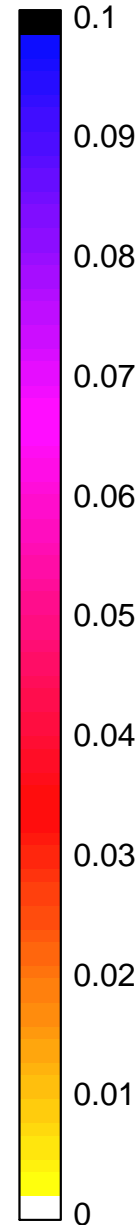

Supplement: pgen.1005397.s041.pdf [file pgen.1005397.s041.pdf]
