# Supplementary material for: Evidence for a Common Origin of Blacksmiths and Cultivators in the Ethiopian Ari within the Last 4500 Years: Lessons for Clustering-Based Inference
Source: PubMed Central journal article supplement (PMC4546361; doi:10.1371/journal.pgen.1005397), 2015-08-20

**ARib: ARic-ARic**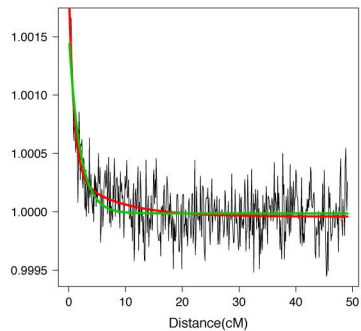**ARib: ARic-SOM**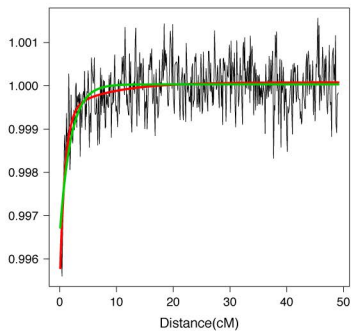**ARib: SOM-SOM**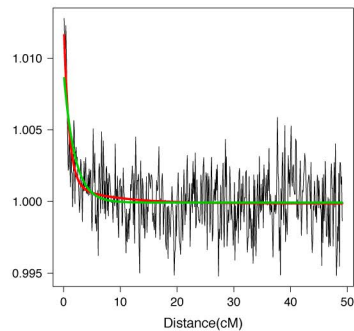**ARic: ARib-ARib**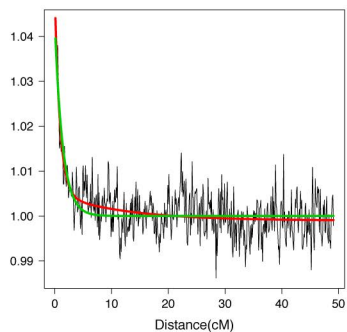**ARic: ARib-ORO**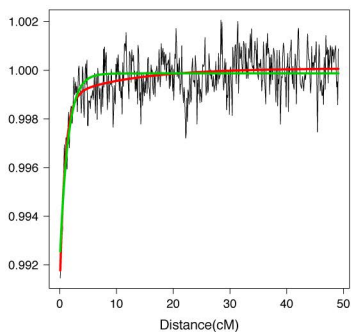**ARic: ORO-ORO**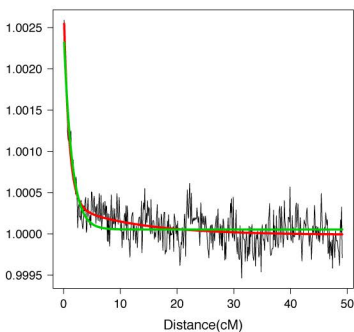**ARic: ARib-ANU**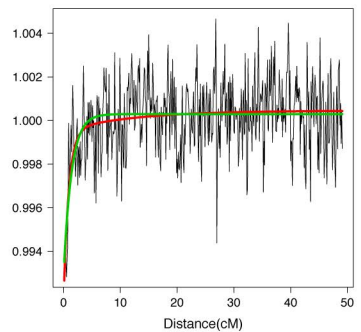**ARic: ANU-ANU**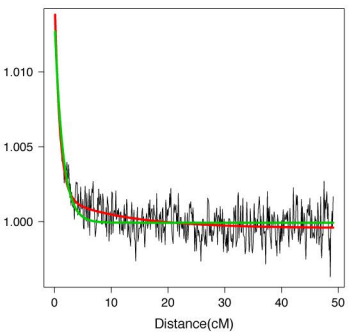**ARic: ANU-ORO**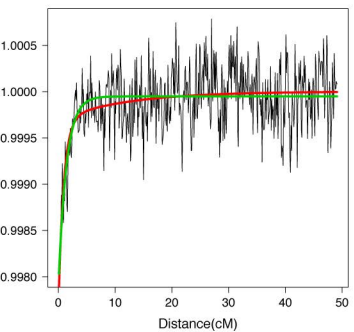

Supplement: pgen.1005397.s048.pdf [file pgen.1005397.s048.pdf]
