# Supplementary material for: Evidence for a Common Origin of Blacksmiths and Cultivators in the Ethiopian Ari within the Last 4500 Years: Lessons for Clustering-Based Inference
Source: PubMed Central journal article supplement (PMC4546361; doi:10.1371/journal.pgen.1005397), 2015-08-20

**ARib: AFA-AFA**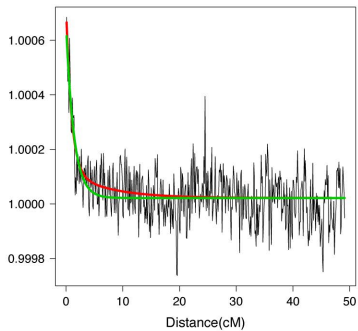**ARib: ANU-AFA**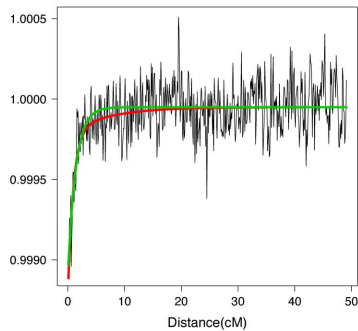**ARib: ANU-ANU**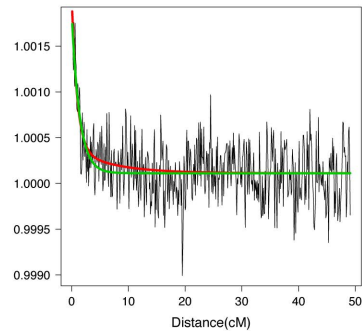**ARic: AFA-AFA**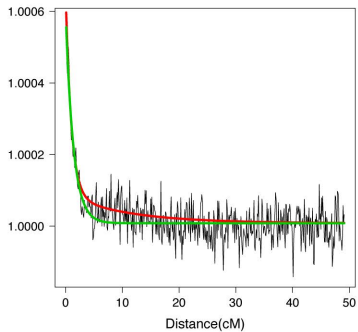**ARic: ANU-AFA**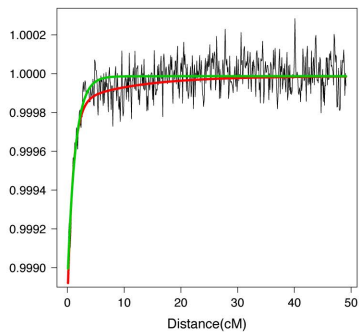**ARic: ANU-ANU**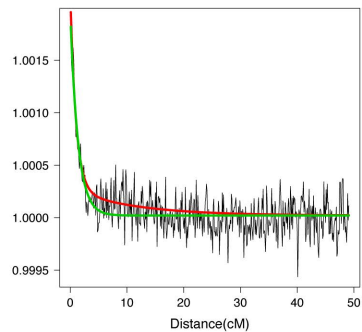

Supplement: pgen.1005397.s050.pdf [file pgen.1005397.s050.pdf]
