# Supplementary material for: Evidence for a Common Origin of Blacksmiths and Cultivators in the Ethiopian Ari within the Last 4500 Years: Lessons for Clustering-Based Inference
Source: PubMed Central journal article supplement (PMC4546361; doi:10.1371/journal.pgen.1005397), 2015-08-20

**AR1b: CEU-CEU**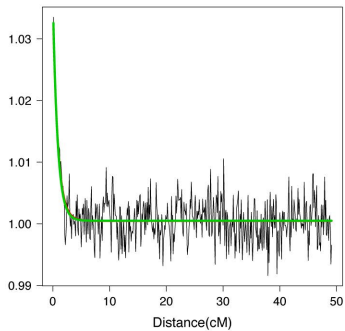**AR1b: CEU-MKK**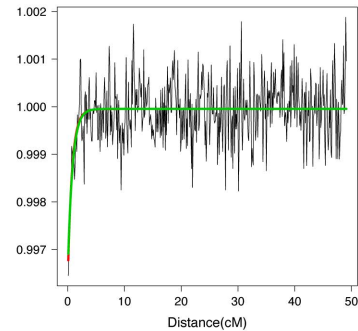**AR1b: MKK-MKK**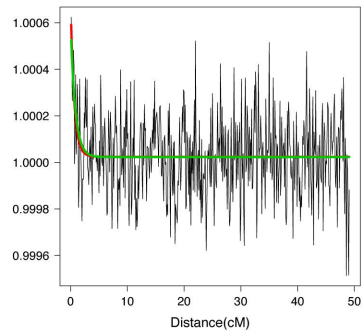**AR1c: CEU-CEU**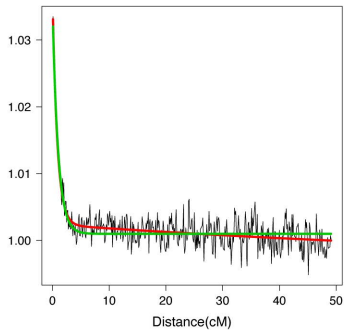**AR1c: CEU-MKK**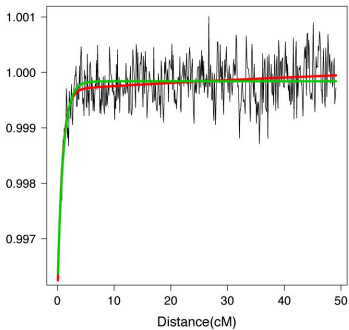**AR1c: MKK-MKK**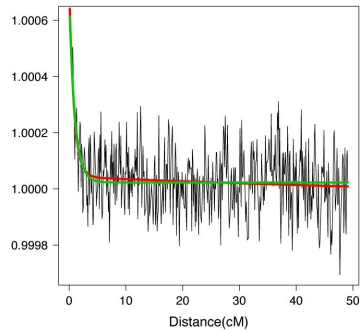

Supplement: pgen.1005397.s051.pdf [file pgen.1005397.s051.pdf]
