# Supplementary material for: Evidence for a Common Origin of Blacksmiths and Cultivators in the Ethiopian Ari within the Last 4500 Years: Lessons for Clustering-Based Inference
Source: PubMed Central journal article supplement (PMC4546361; doi:10.1371/journal.pgen.1005397), 2015-08-20

**split\*=300, BN=30**

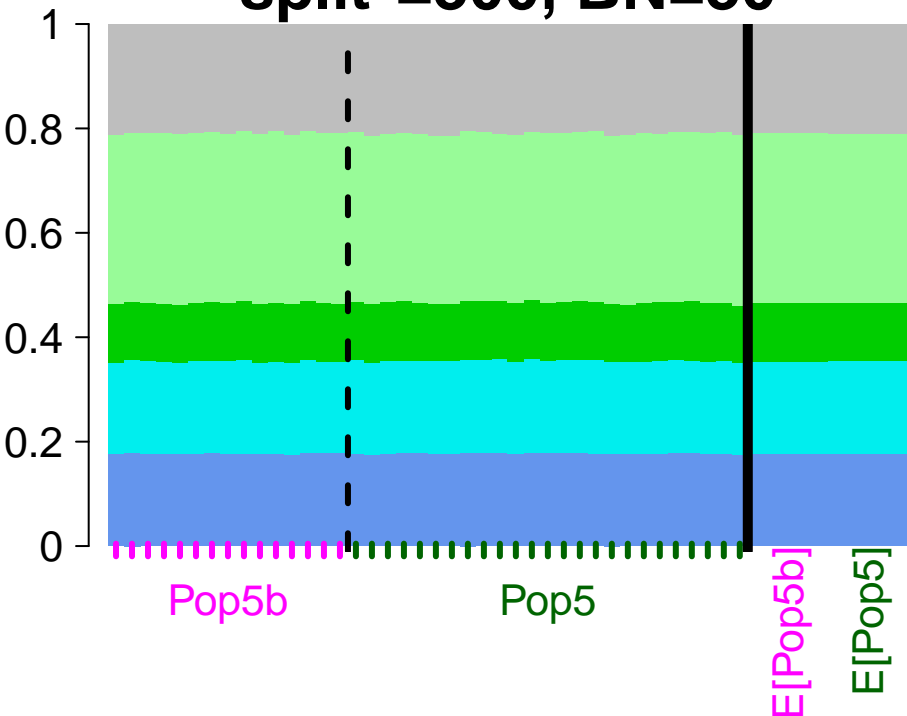

**split\*=400, BN=30**

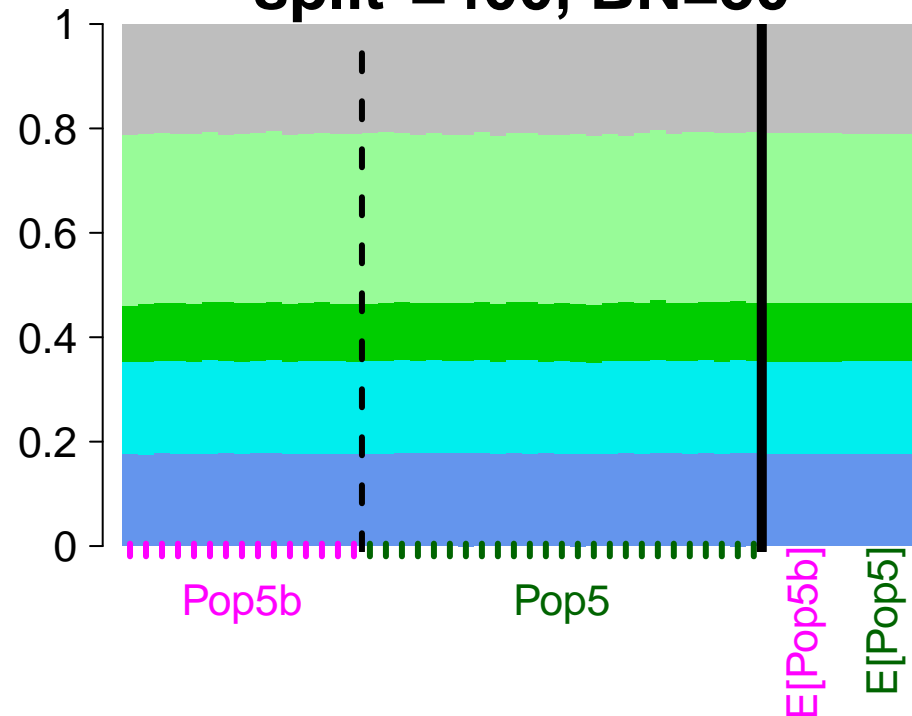

**split\*=500, BN=30**

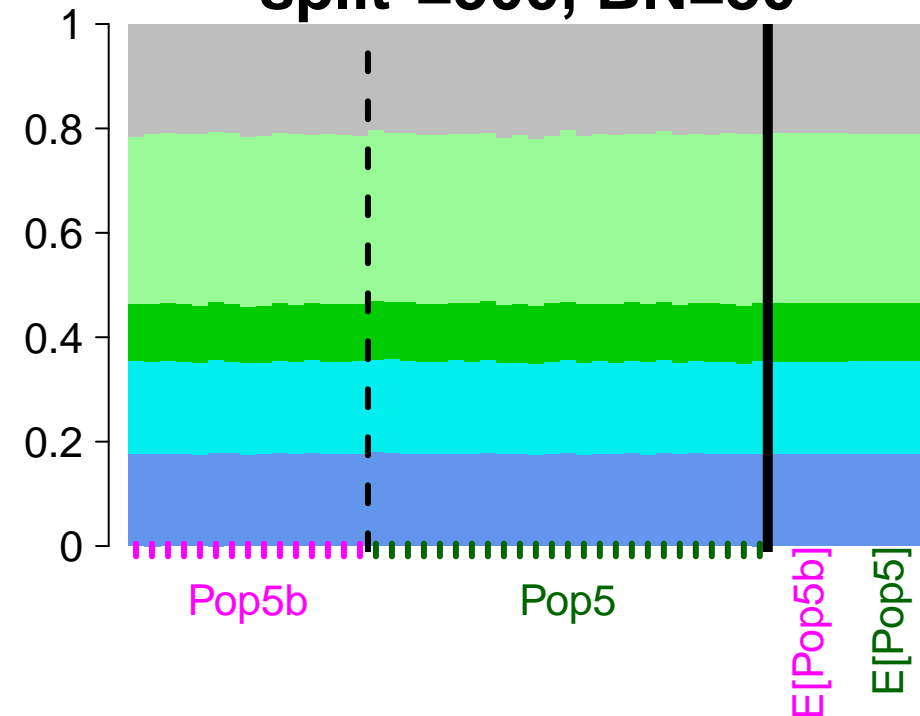

**split\*=300, BN=35**

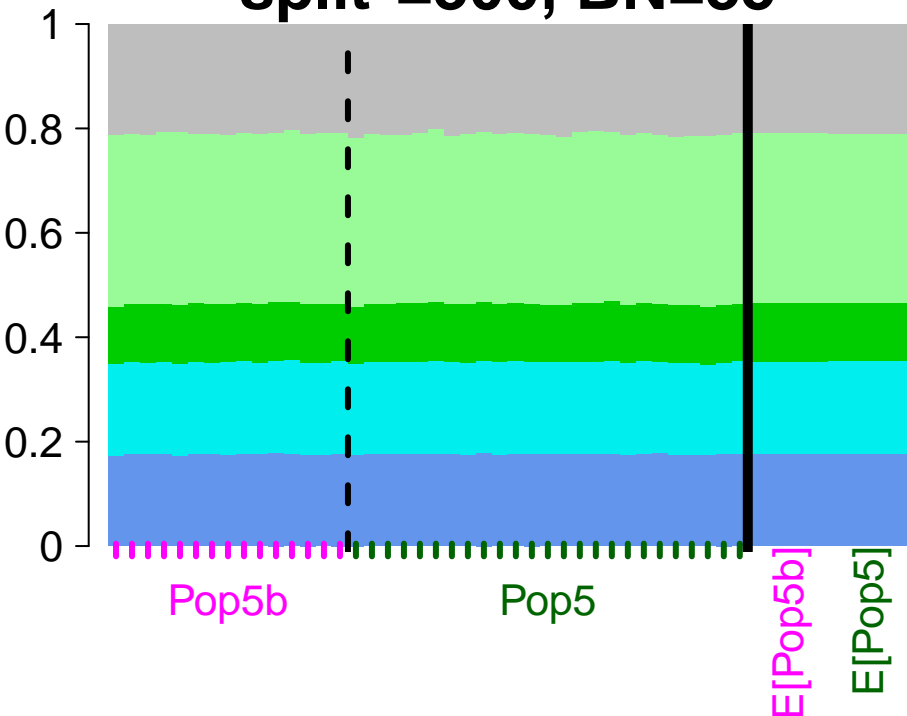

**split\*=400, BN=35**

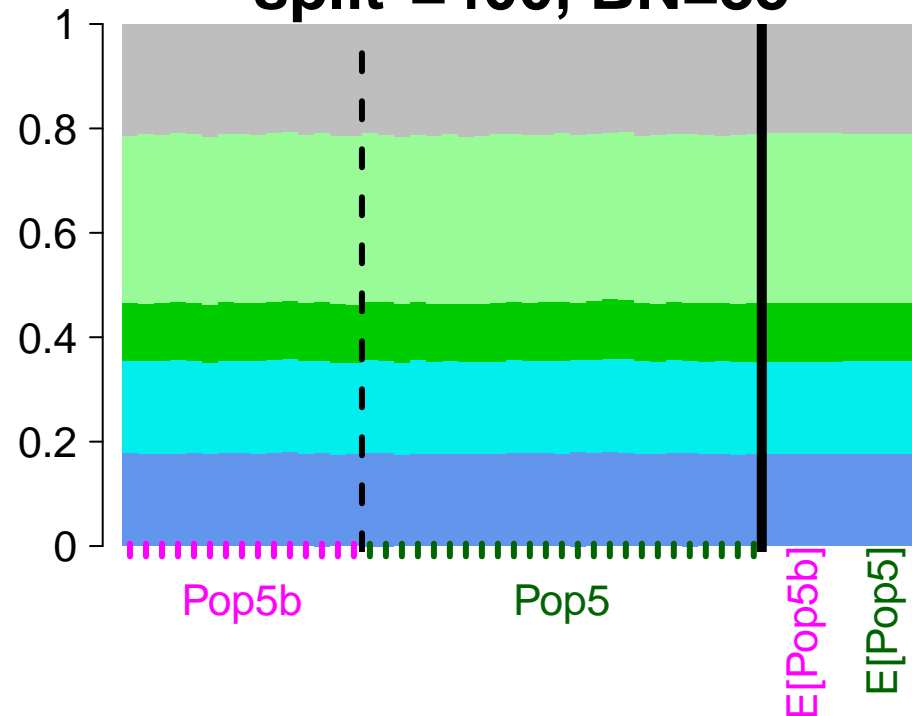

**split\*=500, BN=35**

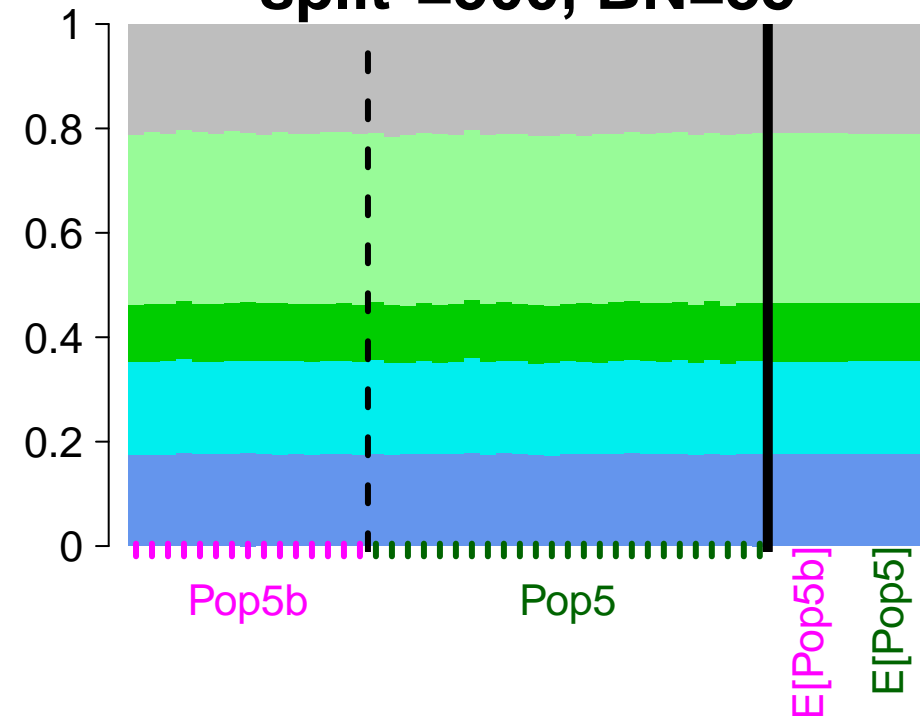

Supplement: pgen.1005397.s053.pdf [file pgen.1005397.s053.pdf]
