# Supplementary material for: Evidence for a Common Origin of Blacksmiths and Cultivators in the Ethiopian Ari within the Last 4500 Years: Lessons for Clustering-Based Inference
Source: PLoS Genet. 2015 Aug 20;11(8):e1005397. doi: 10.1371/journal.pgen.1005397 (PMC4546361; doi:10.1371/journal.pgen.1005397)
Supplement: S12 Table — Inferred proportions of ancestry (i.e. β^s) for non-Pagani-donors analysis (C), plus and minus two standard errors calculated using a weighted block jackknife approach. (PDF) [file pgen.1005397.s012.pdf]

| Group | YRI              | LWK              | MKK              | TSI              | IBS              | CEU              | GBR            | FIN              | CHI              | JPT              |
|-------|------------------|------------------|------------------|------------------|------------------|------------------|----------------|------------------|------------------|------------------|
| YRI   | 54.5 (53.8-55.3) | 45.5 (44.7-46.2) | 0 (0-0)          | 0 (0-0)          | 0 (0-0)          | 0 (0-0)          | 0 (0-0)        | 0 (0-0)          | 0 (0-0)          | 0 (0-0)          |
| LWK   | 41.9 (41.4-42.5) | 57.7 (56.5-58.9) | 0.4 (-0.5-1.3)   | 0 (0-0)          | 0 (0-0)          | 0 (0-0)          | 0 (0-0)        | 0 (0-0)          | 0 (0-0)          | 0 (0-0)          |
| MKK   | 10.9 (10.3-11.5) | 45.7 (44.6-46.7) | 29.2 (27.5-31)   | 12.2 (11.5-12.9) | 0 (0-0)          | 0 (0-0)          | 0 (0-0)        | 0 (0-0)          | 2 (1.7-2.3)      | 0 (0-0)          |
| ANU   | 22.8 (22.1-23.5) | 32.5 (31.6-33.5) | 43.1 (41.9-44.4) | 0 (0-0)          | 0 (0-0)          | 0 (0-0)          | 0 (0-0)        | 0 (0-0)          | 1.5 (1.3-1.8)    | 0 (0-0)          |
| GUM   | 18.5 (17.7-19.2) | 22.3 (20.9-23.7) | 49.6 (47.3-52)   | 0 (0-0)          | 0 (0-0)          | 0 (0-0)          | 0.8 (0.3-1.4)  | 2.1 (1.9-2.2)    | 5.5 (5.2-5.7)    | 1.2 (1-1.4)      |
| ARIB  | 10.7 (9.8-11.6)  | 10.4 (8.5-12.4)  | 59 (55.8-62.3)   | 0 (0-0)          | 0 (0-0)          | 8.9 (7.9-9.9)    | 2.1 (1.5-2.8)  | 0.9 (0.6-1.1)    | 6.7 (6.3-7)      | 1.3 (1.1-1.5)    |
| ARIc  | 10.7 (10.2-11.3) | 9.2 (7.4-11.1)   | 58 (54.9-61.1)   | 0 (0-0)          | 2.2 (-0.7-5.2)   | 8.6 (6.5-10.7)   | 2 (1.5-2.5)    | 0.9 (0.7-1.1)    | 7 (6.8-7.3)      | 1.2 (1.1-1.4)    |
| ORO   | 6.6 (6.2-7)      | 4.3 (2.4-6.2)    | 55.3 (52.2-58.3) | 22 (19.4-24.6)   | 6 (4-8)          | 0 (0-0)          | 0 (0-0)        | 0.4 (0.1-0.6)    | 5.3 (5-5.5)      | 0.2 (0-0.4)      |
| SOM   | 5.3 (4.7-5.9)    | 2 (0.1-3.9)      | 64.2 (60.9-67.6) | 13.5 (11.3-15.7) | 10.1 (8.3-11.9)  | 0 (0-0)          | 0 (0-0)        | 0.4 (0.3-0.6)    | 4.5 (4.1-4.8)    | 0 (0-0)          |
| AFA   | 4.4 (3.9-4.8)    | 2.7 (1.3-4.1)    | 50.5 (48.1-53)   | 37.3 (36.6-38)   | 0 (0-0)          | 0 (0-0)          | 0 (0-0)        | 0 (0-0)          | 5.1 (4.9-5.3)    | 0 (0-0)          |
| TSI   | 0 (0-0)          | 0 (0-0)          | 0 (0-0)          | 6.7 (6.2-7.2)    | 93.3 (92.8-93.8) | 0 (0-0)          | 0 (0-0)        | 0 (0-0)          | 0 (0-0)          | 0 (0-0)          |
| IBS   | 0.7 (0.5-0.9)    | 0.2 (0.1-0.4)    | 0.2 (0.1-0.4)    | 39.2 (37-41.5)   | 1.7 (1.6-1.9)    | 54.9 (51.8-58.1) | 1.4 (-0.6-3.4) | 0 (0-0)          | 0.3 (0-0.6)      | 1.2 (1-1.5)      |
| CEU   | 0 (0-0)          | 0 (0-0)          | 0 (0-0)          | 0 (0-0)          | 49 (44.2-53.8)   | 2.9 (2.5-3.3)    | 44.4 (38.8-50) | 3.7 (2.9-4.5)    | 0 (0-0)          | 0 (0-0)          |
| GBR   | 0 (0-0)          | 0 (0-0)          | 0 (0-0)          | 0 (0-0)          | 0 (0-0)          | 93.3 (92.6-94)   | 5.8 (5.4-6.3)  | 0.9 (0.3-1.5)    | 0 (0-0)          | 0 (0-0)          |
| FIN   | 0 (0-0)          | 0 (0-0)          | 0 (0-0)          | 0 (0-0)          | 0 (0-0)          | 56.3 (55.5-57.2) | 0 (0-0)        | 43.7 (42.8-44.5) | 0 (0-0)          | 0 (0-0)          |
| CHI   | 0 (0-0)          | 0 (0-0)          | 0 (0-0)          | 0 (0-0)          | 0 (0-0)          | 0 (0-0)          | 0 (0-0)        | 0 (0-0)          | 45 (44-45.9)     | 55 (54.1-56)     |
| JPT   | 0 (0-0)          | 0 (0-0)          | 0 (0-0)          | 0 (0-0)          | 0 (0-0)          | 0 (0-0)          | 0 (0-0)        | 0 (0-0)          | 71.6 (70.9-72.3) | 28.4 (27.7-29.1) |
